# Supplementary material
Source: Research Square preprint supplement (doi:10.21203/rs.3.rs-10117781/v1)
Supplement: Supplementary file 1 [file 9dfbc311f65a42aec9dea619.docx]

# Supplementary Information A: Search strategies

**Ovid MEDLINE(R) ALL (1946 to 09 September 2025)**

| **#** | **Query** | **Results** |
| --- | --- | --- |
| 1 | exp *Artificial Intelligence/ | 159,346 |
| 2 | Artificial Intelligence/es, hi, td [Ethics, History, Trends] | 1,715 |
| 3 | AI.m_titl. | 16,274 |
| 4 | ("comput* intelligence" or "comput* reasoning" or "machine intelligence" or "artificial intelligence" or "natural language processing" or 'llm*1 or "large language model*" or "language learning model*" or "classification algorithm*" or "computer heuristic*" or "convolutional network*" or DALL-E or "decision support system*" or "decision tree" or DeepAI or "deep learning" or "data science" or "feature detection" or "generative pre-trained transformer" or "generative pretrained transformer" or invideo or "learning algorithm*" or "machine learning" or "neural net*" or "reinforcement learning" or "learning algorithm*" or "*supervised learning" or "intelligent agent*" or conversational agent* or chatbot*).ti,ab,kf. | 415,833 |
| 5 | ("Bing chat" or ChatGPT* or "Chat GPT" or "Google* Bard" or "Google* Gemini" or "IBM Watson" or "Microsoft* Bing" or Copilot or OpenAI or "Open AI" or PathAI or "Path AI" or DALL-E or invideo or Claude or Deepseek).ti,ab,kf. | 9,959 |
| 6 | 1 or 2 or 3 or 4 or 5 | 472,244 |
| 7 | exp *Public Health/ | 2,237,137 |
| 8 | Public health.ti,kf,jn. | 150,394 |
| 9 | 7 or 8 | 2,329,979 |
| 10 | 6 and 9 | 28,236 |
| 11 | editorial/ | 735,952 |
| 12 | (future or horizon or disrupt* or innovat* or emerging or roadmap or frontier* or nowcasting or trends or invention* or paradigm or "health 4.0" or next or opportunities or direction* or potential* or latest).ti. | 968,788 |
| 13 | (technolog* adj2 (new or novel or advances or innovat* or future or disrupt* or next generation)).ab. | 92,886 |
| 14 | (future adj1 (trend* or direction* potential)).ab. | 5,942 |
| 15 | "latest development*".ab. | 5,243 |
| 16 | 11 or 12 or 13 or 14 or 15 | 1,754,820 |
| 17 | 10 and 16 | 1,667 |
| 18 | limit 17 to yr="2020 -Current" | 1,150 |

**Embase (1974 to 08 September 2025)**

| **#** | **Query** | **Results** |
| --- | --- | --- |
| 1 | exp *artificial intelligence/ | 78,681 |
| 2 | exp artificial intelligence software/ | 2,737 |
| 3 | AI.m_titl. | 20,480 |
| 4 | ("comput* intelligence" or "comput* reasoning" or "machine intelligence" or "artificial intelligence" or "natural language processing" or 'llm*1 or "large language model*" or "language learning model*" or "classification algorithm*" or "computer heuristic*" or "convolutional network*" or DALL-E or "decision support system*" or "decision tree" or DeepAI or "deep learning" or "data science" or "feature detection" or "generative pre-trained transformer" or "generative pretrained transformer" or invideo or "learning algorithm*" or "machine learning" or "neural net*" or "reinforcement learning" or "learning algorithm*" or "*supervised learning" or "intelligent agent*" or conversational agent* or chatbot*).ti,ab,kf. | 486,184 |
| 5 | ("Bing chat" or ChatGPT* or "Chat GPT" or "Google* Bard" or "Google* Gemini" or "IBM Watson" or "Microsoft* Bing" or Copilot or OpenAI or "Open AI" or PathAI or "Path AI" or DALL-E or invideo or Claude or Deepseek).ti,ab,kf. | 11,082 |
| 6 | 1 or 2 or 3 or 4 or 5 | 513,816 |
| 7 | exp *public health/ | 78,950 |
| 8 | Public health.ti,kf,jn. | 119,607 |
| 9 | 7 or 8 | 160,684 |
| 10 | 6 and 9 | 1,914 |
| 11 | editorial/ | 818,774 |
| 12 | (future or horizon or disrupt* or innovat* or emerging or roadmap or frontier* or nowcasting or trends or invention* or paradigm or "health 4.0" or next or opportunities or direction* or potential* or latest).ti. | 1,132,992 |
| 13 | (technolog* adj2 (new or novel or advances or innovat* or future or disrupt* or next generation)).ab. | 119,604 |
| 14 | (future adj1 (trend* or direction* potential)).ab. | 6,479 |
| 15 | "latest development*".ab. | 5,945 |
| 16 | 11 or 12 or 13 or 14 or 15 | 2,029,384 |
| 17 | 10 and 16 | 261 |
| 18 | limit 17 to yr="2020 -Current" | 238 |

**Scopus**

| **#** | **Query** | **Results** |
| --- | --- | --- |
| 1 | (TITLE("comput* intelligence" or "comput* reasoning" or "machine intelligence" or "artificial intelligence" or "natural language processing" or llm*1 or "large language model*" or "language learning model*" or "classification algorithm*" or "computer heuristic*" or "convolutional network*" or "expert system*" or "recommender system*" or "decision support system*" or "decision tree" or "deep learning" or "data science" or "feature detection" or "generative pre-trained transformer" or "generative pretrained transformer" or "learning algorithm*" or "machine learning" or "neural net*" or "reinforcement learning" or "*supervised learning" or "intelligent agent*" conversational agent* or chatbot*) OR KEY("artificial intelligence") AND TITLE("Public Health") OR KEY("Public Health") AND TITLE(future or horizon or disrupt* or innovat* or emerg* or roadmap or forecasting or frontier* or nowcasting or trends or invention* or paradigm or "health 4.0" or next)) AND PUBYEAR > 2019 AND PUBYEAR < 2026 | 381 |

**Web of Science**

| **#** | **Query** | **Results** |
| --- | --- | --- |
| 1 | "comput* intelligence" or "comput* reasoning" or "machine intelligence" or "artificial intelligence" or "natural language processing" or llm*1 or "large language model*" or "language learning model*" or "classification algorithm*" or "computer heuristic*" or "convolutional network*" or "expert system*" or "recommender system*" or "decision support system*" or "decision tree" or "deep learning" or "data science" or "feature detection" or "generative pre-trained transformer" or "generative pretrained transformer" or "learning algorithm*" or "machine learning" or "neural net*" or "reinforcement learning" or "*supervised learning" or "intelligent agent*" or "conversational agent*" or chatbot* or "Bing chat" or ChatGPT* or "Chat GPT" or "Google* Bard" or "Google* Gemini" or "IBM Watson" or "Microsoft* Bing" or Copilot or OpenAI or "Open AI" or PathAI or "Path AI" or DALL-E or invideo or Claude or Deepseek (Title) and "public health" (All Fields) and future or horizon or disrupt* or innovat* or emerg* or roadmap or forecasting or frontier* or nowcasting or trends or invention* or paradigm or "health 4.0" or next (Title) | 377 |
