# Supplementary material
Source: Research Square preprint supplement (doi:10.21203/rs.3.rs-10117781/v1)
Supplement: Supplementary file 2 [file ae66ebd12caeeb3c78da35aa.xlsx]

## Sheet: PRISMA
			PRISMA						Full text screening summary
Title and abstract screening				Identification of studies via databases and registers			Identification of studies via other methods		To do	0
Database	Number		Identification	Records identified from databases (n = 2,146)	Records removed before screening:		Records identified from:		Include	67
MEDLINE (Ovid)	1150			MEDLINE (Ovid): n = 1,150	Duplicate records removed manually (n = 341)		citation searching (n = 0)		Exclude	253
Embase (Ovid)	238			Embase (Ovid): n = 238	Records removed for other reasons (n = 0)		expert consultation (n = 0)		Check required	0
Scopus	381			Scopus: n = 381					Consensus required	0
Web of Science	377			Web of Science: n = 377					Find PDF	0
									Not retrieved	0
Total after deduplication:	1805
Records removed for other reasons:
			Screening	Records screened	Records excluded
				(n = 1,805)	(n = 1,485)
				Reports sought for retrival	Reports not retrieved
				(n = 320)	(n = 0)
Full text screening
Exclude reasons				Reports assessed for eligibility	Reports excluded: (n = 253)
0. Duplicate	3			(n = 320)	0. Duplicate (n = 3)
1. No relevant information	71				1. No relevant information (n = 71)
2. Wrong country	6				2. Wrong country (n = 6)
3. Wrong setting	143				3. Wrong setting (n = 143)
4. Wrong study type	22				4. Wrong study type (n = 22)
5. Wrong language	3				5. Wrong language (n = 3)
6. Retracted	2				6. Retracted (n = 2)
7. Wrong time period	3				7. Wrong time period (n = 3)
Total:	253
			Included	Papers included in the review
				(n = 67)

## Sheet: Full text screening
Authors	Title	Year	Journal	Volume	Issue	Pages	Endnote ID	DOI	Endnote reference	Full text available?	Link	Full text name	Study source	PDF	Reviewer 1	Include / Exclude	Exclusion reason	Notes: 317 done, 0 to go (100%)	PDF	Reviewer 2	Include / Exclude	Exclusion reason	Notes: 317 done, 0 to go (100%)	Consensus	Exclusion reason	Notes		Exclusion reasons		Reviewer	Folder
Abade, Porto, Scholze, Kuntath, Barros, Berra, Ramos, Arcencio, Alves	A comparative analysis of classical and machine learning methods for forecasting TB/HIV co-infection	2024	Sci Rep	14	1	18991	3952	10.1038/s41598-024-69580-4	{Abade, 2024 #3952}	Yes	Link		Main search	PDF	SH	Exclude	2. Wrong country	Brazil	PDF	CT	Exclude	2. Wrong country		Exclude	2. Wrong country			0. Duplicate		SH
Abdel Magid, Desjardins, Hu	Opportunities and shortcomings of AI for spatial epidemiology and health disparities research on aging and the life course	2024	Health Place	89		103323	3953	10.1016/j.healthplace.2024.103323	{Abdel Magid, 2024 #3953}	Yes	Link		Main search	PDF	SH	Exclude	3. Wrong setting	Aging research, but not PH enough	PDF	CT	Exclude	3. Wrong setting		Exclude	3. Wrong setting			1. No relevant information		CT
Abdelouahed, Yateem, Amzil, Aribi, Abdelwahed, Fredericks	Integrating artificial intelligence into public health education and healthcare: insights from the COVID-19 and monkeypox crises for future pandemic readiness	2025	Frontiers in Education	10			3954	10.3389/feduc.2025.1518909	{Abdelouahed, 2025 #3954}	Yes	Link		Main search	PDF	SH	Include		PH education	PDF	CT	Include			Include				2. Wrong country
Aggar, Sorwar, Seton, Penman, Ward	Smart home technology to support older people's quality of life: A longitudinal pilot study	2023	Int J Older People Nurs	18	1	e12489	4223	https://doi.org/10.1111/opn.12489	{Aggar, 2023 #4223}	Yes	Link		Main search	PDF	SH	Exclude	3. Wrong setting	Not public health - quality of life	PDF	CT	Exclude	3. Wrong setting		Exclude	3. Wrong setting			3. Wrong setting
Ahmed, Ahmed, Saha, Ahmed, Sutradhar	Optimization algorithms as training approach with hybrid deep learning methods to develop an ultraviolet index forecasting model	2022	Stoch Environ Res Risk Assess	36	10	3011-3039	3957	10.1007/s00477-022-02177-3	{Ahmed, 2022 #3957}	Yes	Link		Main search	PDF	SH	Exclude	3. Wrong setting	UV index forecasting	PDF	CT	Exclude	3. Wrong setting		Exclude	3. Wrong setting			4. Wrong study type
Ahmed, Okesanya, Olaleke, Adigun, Adebayo, Oso, Eshun, Lucero-Prisno	Integrating Digital Health Innovations to Achieve Universal Health Coverage: Promoting Health Outcomes and Quality Through Global Public Health Equity	2025	Healthcare (Basel)	13	9		4225	https://doi.org/10.3390/healthcare13091060	{Ahmed, 2025 #4225}	Yes	Link		Main search	PDF	SH	Exclude	3. Wrong setting	Healthcare	PDF	CT	Exclude	3. Wrong setting		Exclude	3. Wrong setting			5. Wrong language
Al Dweik, Ajaj, Kotb, Halabi, Sadier, Sarsour, Elhadi	Opportunities and challenges in leveraging digital technology for mental health system strengthening: a systematic review to inform interventions in the United Arab Emirates	2024	BMC Public Health	24	1	2592	3958	10.1186/s12889-024-19980-y	{Al Dweik, 2024 #3958}	Yes	Link		Main search	PDF	SH	Exclude	3. Wrong setting	Clinical settings	PDF	CT	Exclude	3. Wrong setting		Exclude	3. Wrong setting			6. Retracted
Al Sadi, Balachandran	Leveraging a 7-Layer Long Short-Term Memory Model for Early Detection and Prevention of Diabetes in Oman: An Innovative Approach	2024	Bioengineering (Basel)	11	4		3959	10.3390/bioengineering11040379	{Al Sadi, 2024 #3959}	Yes	Link		Main search	PDF	SH	Exclude	3. Wrong setting	More diagnosis of diabetes	PDF	CT	Exclude	3. Wrong setting		Exclude	3. Wrong setting
Ali Maher, Panu Napodano, Bellizzi	Potential of artificial intelligence in public health disaster and emergency management	2024	Public Health	231		e1-e2	4106	10.1016/j.puhe.2024.03.017	{Ali Maher, 2024 #4106}	Yes	Link		Main search	PDF	SH	Include		PH disasters	PDF	CT	Include			Include
Ali Maher, Cegolon, Bellizzi	Artificial intelligence as a tool for enhancing the performance of public health emergency operation centres (EOC)	2025	BMJ Glob Health	10	3		4105	10.1136/bmjgh-2024-016097	{Ali Maher, 2025 #4105}	Yes	Link		Main search	PDF	SH	Include		PH emergency operation centres	PDF	CT	Include		Presuming this is ok on the basis that it covers a broad range of PH emergency planning activities, not soley healthcare capacity planning	Include
Ali, Jahagirdar, Blaney, Dahiya, Gangwani, Patel, Hayat, Jaber, Simonetto, Satapathy	Forecasting Alcohol-Related Liver Disease Mortality Trends in Younger Populations Using Advanced Time-Series Models: A 1999-2030 Analysis	2024	JGH Open	8	12	e70057	3960	10.1002/jgh3.70057	{Ali, 2024 #3960}	Yes	Link		Main search	PDF	SH	Include		Non-infectious forecasting	PDF	CT	Include			Include
Ali, Hussain, Haque	Advances, challenges, and future research needs in machine learning-based crash prediction models: A systematic review	2024	Accid Anal Prev	194		107378	3962	10.1016/j.aap.2023.107378	{Ali, 2024 #3962}	Yes	Link		Main search	PDF	SH	Exclude	3. Wrong setting	Vehicle crashes	PDF	CT	Exclude	3. Wrong setting		Exclude	3. Wrong setting
Ali, Rasheed, Moond, Dahiya, Swaiti, Gangwani, Hayat, Advani	Obesity Related Mortality in the Next Generation: Projections Based on Machine Learning for Young Americans (1999–2035)	2025	Obesity Science & Practice	11	2	e70062	3961	10.1002/osp4.70062	{Ali, 2025 #3961}	Yes	Link		Main search	PDF	SH	Include		Non-infectious forecasting	PDF	CT	Include			Include
Alimadadi, Aryal, Manandhar, Munroe, Joe, Cheng	Artificial intelligence and machine learning to fight COVID-19	2020	Physiol Genomics	52	4	200-202	3963	10.1152/physiolgenomics.00029.2020	{Alimadadi, 2020 #3963}	Yes	Link		Main search	PDF	SH	Exclude	3. Wrong setting	Outbreak (COVID-19)	PDF	CT	Exclude	3. Wrong setting		Exclude	3. Wrong setting
Alotaibi, Alnajjar, Cappuccio, Khalid, Alhmiedat, Mubin	Efficacy of Emerging Technologies to Manage Childhood Obesity	2022	Diabetes Metab Syndr Obes	15		1227-1244	3964	10.2147/DMSO.S357176	{Alotaibi, 2022 #3964}	Yes	Link		Main search	PDF	SH	Include		Non-infectious forecasting	PDF	CT	Include			Include
Amani, Sarkodie	Mitigating spread of contamination in meat supply chain management using deep learning	2022	Sci Rep	12	1	5037	3965	10.1038/s41598-022-08993-5	{Amani, 2022 #3965}	Yes	Link		Main search	PDF	SH	Exclude	3. Wrong setting	Food safety	PDF	CT	Exclude	3. Wrong setting		Exclude	3. Wrong setting
Amjad, Graham, McCormick, Claborn	AI and Big Data approaches to addressing the opioid crisis: a scoping review protocol	2024	BMJ Open	14	8	e084728	4234	https://doi.org/10.1136/bmjopen-2024-084728	{Amjad, 2024 #4234}	Yes	Link		Main search	PDF	SH	Exclude	4. Wrong study type	Protocol	PDF	CT	Exclude	4. Wrong study type		Exclude	4. Wrong study type
An, Wang	Artificial Intelligence Applications to Public Health Nutrition	2023	Nutrients	15	19	4285	3966	10.3390/nu15194285	{An, 2023 #3966}	Yes	Link		Main search	PDF	SH	Include		PH nutrition	PDF	CT	Include			Include
An, Yang	Artificial Intelligence Holds Promise for Transforming Public Health Nutrition	2024	Nutrients	16	23		3967	10.3390/nu16234034	{An, 2024 #3967}	Yes	Link		Main search	PDF	SH	Exclude	1. No relevant information	PH nutrition, but I couldn't find anything good to extract here	PDF	CT	Exclude	1. No relevant information	Are we citation chasing? (I'm guessing not!) This looks like a covering article for a special issue that mention 2x potentially relevant papers to PH. But in and of itself, not for inclusion	Exclude	1. No relevant information
Anghel, Cioara, Moldovan, Antal, Pop, Salomie, Pop, Chifu	Smart Environments and Social Robots for Age-Friendly Integrated Care Services	2020	Int J Environ Res Public Health	17	11		4235	https://doi.org/10.3390/ijerph17113801	{Anghel, 2020 #4235}	Yes	Link		Main search	PDF	SH	Include			PDF	CT	Include			Include
Anjaria, Asediya, Bhavsar, Pathak, Desai, Patil	Artificial Intelligence in Public Health: Revolutionizing Epidemiological Surveillance for Pandemic Preparedness and Equitable Vaccine Access	2023	Vaccines (Basel)	11	7		3968	10.3390/vaccines11071154	{Anjaria, 2023 #3968}	Yes	Link		Main search	PDF	SH	Exclude	3. Wrong setting	Equitable vaccine access, but pandemic setting (also not much to say)	PDF	CT	Exclude	3. Wrong setting		Exclude	3. Wrong setting
Antezana Soria Galvarro	Enfrentando los Retos de la Inteligencia Artificial: Ética, Transparencia y Futuro	2023	Gaceta Médica Boliviana	46	2	2025-06-05	3969	10.47993/gmb.v46i2.797	{Antezana Soria Galvarro, 2023 #3969}	Yes	Link		Main search	PDF	SH	Exclude	1. No relevant information		PDF	CT	Exclude	1. No relevant information		Exclude	1. No relevant information
Arifuzzaman, Shaikh, Bhuiyan, Chowdhury, Atoul	Innovation in public health surveillance for social distancing during the COVID-19 pandemic: A deep learning and object detection based novel approach	2024	PLoS One	19	9	e0308460	3970	10.1371/journal.pone.0308460	{Arifuzzaman, 2024 #3970}	Yes	Link		Main search	PDF	SH	Include		PH surveillance	PDF	CT	Include			Include
Ashraf, Mackey, Fittler	Search Engines and Generative Artificial Intelligence Integration: Public Health Risks and Recommendations to Safeguard Consumers Online	2024	JMIR Public Health Surveill	10		e53086	3971	10.2196/53086	{Ashraf, 2024 #3971}	Yes	Link		Main search	PDF	SH	Exclude	4. Wrong study type	Just risks: not potential uses	PDF	CT	Exclude	1. No relevant information		Exclude	4. Wrong study type
Ates, Pandey, Gousiopoulos, Soldatos	A brief reference to AI-driven audible reality (AuRa) in open world: potential, applications, and evaluation	2024	Front Artif Intell	7		1424371	3972	10.3389/frai.2024.1424371	{Ates, 2024 #3972}	Yes	Link		Main search	PDF	SH	Exclude	3. Wrong setting	No good PH examples	PDF	CT	Exclude	3. Wrong setting		Exclude	3. Wrong setting
Awan, Gonzalez, Sharma	A Neoteric Approach toward Social Media in Public Health Informatics: A Narrative Review of Current Trends and Future Directions	2024	Information	15	5		3973	10.3390/info15050276	{Awan, 2024 #3973}	Yes	Link		Main search	PDF	SH	Include		PH informatics	PDF	CT	Include			Include
Ayenigbara	The evolving nature of artificial intelligence: role in public health and health promotion	2024	J Public Health (Oxf)	46	2	e322-e323	3974	10.1093/pubmed/fdad240	{Ayenigbara, 2024 #3974}	Yes	Link		Main search	PDF	SH	Include		Health promotion (commentary)	PDF	CT	Include			Include
Ayub, Khan, Shehryar Ali Naqvi, Faseeh, Kim, Mehmood, Kim	Unraveling the Potential of Attentive Bi-LSTM for Accurate Obesity Prognosis: Advancing Public Health towards Sustainable Cities	2024	Bioengineering (Basel)	11	6		3975	10.3390/bioengineering11060533	{Ayub, 2024 #3975}	Yes	Link		Main search	PDF	SH	Include		Non-infectious forecasting	PDF	CT	Include			Include
Azzolina, Bressan, Lorenzoni, Baldan, Bartolotta, Scognamiglio, Francavilla, Lanera, Da Dalt, Gregori	Pediatric Injury Surveillance From Uncoded Emergency Department Admission Records in Italy: Machine Learning-Based Text-Mining Approach	2023	JMIR Public Health Surveill	9		e44467	4241	https://doi.org/10.2196/44467	{Azzolina, 2023 #4241}	Yes	Link		Main search	PDF	SH	Exclude	3. Wrong setting	Healthcare	PDF	CT	Exclude	3. Wrong setting		Exclude	3. Wrong setting
Baclic, Tunis, Young, Doan, Swerdfeger, Schonfeld	Challenges and opportunities for public health made possible by advances in natural language processing	2020	Can Commun Dis Rep	46	6	161-168	3976	10.14745/ccdr.v46i06a02	{Baclic, 2020 #3976}	Yes	Link		Main search	PDF	SH	Include		NLP for PH	PDF	CT	Include			Include
Badawi, Laamarti, El Saddik	Devising Digital Twins DNA Paradigm for Modeling ISO-Based City Services	2021	Sensors (Basel)	21	4		4242	https://doi.org/10.3390/s21041047	{Badawi, 2021 #4242}	Yes	Link		Main search	PDF	SH	Exclude	1. No relevant information		PDF	CT	Exclude	1. No relevant information		Exclude	1. No relevant information
Badidi	Edge AI for Early Detection of Chronic Diseases and the Spread of Infectious Diseases: Opportunities, Challenges, and Future Directions	2023	Future Internet	15	11		4243	https://doi.org/10.3390/fi15110370	{Badidi, 2023 #4243}	Yes	Link		Main search	PDF	SH	Exclude	3. Wrong setting	Healthcare	PDF	CT	Exclude	3. Wrong setting		Exclude	3. Wrong setting
Bai, Mardini	Advances of artificial intelligence in predicting frailty using real-world data: A scoping review	2024	Ageing Res Rev	101		102529	4244	https://doi.org/10.1016/j.arr.2024.102529	{Bai, 2024 #4244}	Yes	Link		Main search	PDF	SH	Exclude	3. Wrong setting	Healthcare (mostly: predicting frailty, which was also used in residential contexts, but feels very weighted toward healthcare rather than public health - individual prediction rather than population prediction)	PDF	CT	Exclude	3. Wrong setting		Exclude	3. Wrong setting
Bakken	Addressing Consequential Public Health Problems Through Informatics and Data Science	2022	J Am Med Inform Assoc	29	3	413-414	4245	https://doi.org/10.1093/jamia/ocab294	{Bakken, 2022 #4245}	Yes	Link		Main search	PDF	SH	Exclude	1. No relevant information		PDF	CT	Exclude	1. No relevant information		Exclude	1. No relevant information
Bakken	Informatics and data science approaches address significant public health problems	2023	J Am Med Inform Assoc	30	6	1009-1010	4246	https://doi.org/10.1093/jamia/ocad076	{Bakken, 2023 #4246}	Yes	Link		Main search	PDF	SH	Exclude	1. No relevant information		PDF	CT	Exclude	1. No relevant information		Exclude	1. No relevant information
Bakken	Innovative informatics interventions to improve health and health care	2023	J Am Med Inform Assoc	30	3	409-410	4247	https://doi.org/10.1093/jamia/ocac255	{Bakken, 2023 #4247}	Yes	Link		Main search	PDF	SH	Exclude	1. No relevant information		PDF	CT	Exclude	1. No relevant information		Exclude	1. No relevant information
Bamashmous	The Role of Artificial Intelligence in Transforming Dental Public Health: Current Applications, Ethical Considerations, and Future Directions	2025	The Open Dentistry Journal	19	1		3977	10.2174/0118742106363413250211053942	{Bamashmous, 2025 #3977}	Yes	Link		Main search	PDF	SH	Include		Dental PH	PDF	CT	Include			Include
Bargiotas, Wang, Mantilla, Quijoux, Moreau, Vidal, Barrois, Nicolai, Audiffren, Labourdette, Bertin-Hugaul, Oudre, Buffat, Yelnik, Ricard, Vayatis, Vidal	Preventing falls: the use of machine learning for the prediction of future falls in individuals without history of fall	2023	J Neurol	270	2	618-631	3978	10.1007/s00415-022-11251-3	{Bargiotas, 2023 #3978}	Yes	Link		Main search	PDF	SH	Exclude	3. Wrong setting	Individual risk of falls	PDF	CT	Exclude	3. Wrong setting		Exclude	3. Wrong setting
Bauer, Lizotte	Artificial Intelligence, Intersectionality, and the Future of Public Health	2021	Am J Public Health	111	1	98-100	3979	10.2105/AJPH.2020.306006	{Bauer, 2021 #3979}	Yes	Link		Main search	PDF	SH	Include		General PH (commentary)	PDF	CT	Include			Include
Bazzano, Mantsios, Mattei, Kosorok, Culotta	AI Can Be a Powerful Social Innovation for Public Health if Community Engagement Is at the Core	2025	J Med Internet Res	27		e68198	3980	10.2196/68198	{Bazzano, 2025 #3980}	Yes	Link		Main search	PDF	SH	Exclude	1. No relevant information		PDF	CT	Exclude	1. No relevant information		Exclude	1. No relevant information
Bharat, Hickman, Barbieri, Degenhardt	Big data and predictive modelling for the opioid crisis: existing research and future potential	2021	Lancet Digit Health	3	6	e397-e407	3981	10.1016/S2589-7500(21)00058-3	{Bharat, 2021 #3981}	Yes	Link		Main search	PDF	SH	Include		Opioid crisis	PDF	CT	Include			Include
Bharel, Auerbach, Nguyen, DeSalvo	Transforming Public Health Practice With Generative Artificial Intelligence	2024	Health Aff (Millwood)	43	6	776-782	3982	10.1377/hlthaff.2024.00050	{Bharel, 2024 #3982}	Yes	Link		Main search	PDF	SH	Include		Public communication, organizational performance, novel insights	PDF	CT	Include			Include
Bhattacharjee, Bhattacharya	Leveraging AI-driven nudge theory to enhance hand hygiene compliance: paving the path for future infection control	2024	Front Public Health	12		1522045	4249	https://doi.org/10.3389/fpubh.2024.1522045	{Bhattacharjee, 2024 #4249}	Yes	Link		Main search	PDF	SH	Exclude	3. Wrong setting	Healthcare	PDF	CT	Exclude	3. Wrong setting		Exclude	3. Wrong setting
Bian, Huang	Predicting PM2.5 concentration with enhanced state-trend awareness and uncertainty analysis using bagging and LSTM neural networks	2024	J Environ Qual	53	4	441-455	3983	10.1002/jeq2.20589	{Bian, 2024 #3983}	Yes	Link		Main search	PDF	SH	Exclude	3. Wrong setting	Pollution	PDF	CT	Exclude	3. Wrong setting		Exclude	3. Wrong setting
Biri, Kucuktas, Uysal, Hardalac	Forecasting the future popularity of the anti-vax narrative on Twitter with machine learning	2023	The Journal of Supercomputing	80	3	2917-2947	3984	10.1007/s11227-023-05567-8	{Biri, 2023 #3984}	Yes	Link		Main search	PDF	SH	Exclude	2. Wrong country	Turkey	PDF	CT	Exclude	2. Wrong country		Exclude	2. Wrong country
Bosward, Braunack-Mayer, Frost, Carter	The emergence and future of precision public health: a scoping review	2025	Health Policy and Technology	14	5	101056	3985	10.1016/j.hlpt.2025.101056	{Bosward, 2025 #3985}	Yes	Link		Main search	PDF	SH	Exclude	1. No relevant information		PDF	CT	Exclude	1. No relevant information		Exclude	1. No relevant information
Branda, Scarpa	Implications of Artificial Intelligence in Addressing Antimicrobial Resistance: Innovations, Global Challenges, and Healthcare's Future	2024	Antibiotics (Basel)	13	6		3986	10.3390/antibiotics13060502	{Branda, 2024 #3986}	Yes	Link		Main search	PDF	SH	Exclude	3. Wrong setting	AMR	PDF	CT	Exclude	3. Wrong setting		Exclude	3. Wrong setting
Branda, Stella, Ceccarelli, Cabitza, Ceccarelli, Maruotti, Ciccozzi, Scarpa	The Role of AI-Based Chatbots in Public Health Emergencies: A Narrative Review	2025	Future Internet	17	4		3987	10.3390/fi17040145	{Branda, 2025 #3987}	Yes	Link		Main search	PDF	SH	Exclude	3. Wrong setting	Outbreaks	PDF	CT	Exclude	3. Wrong setting		Exclude	3. Wrong setting
Bublitz, Oetomo, Sahu, Kuang, Fadrique, Velmovitsky, Nobrega, Morita	Disruptive Technologies for Environment and Health Research: An Overview of Artificial Intelligence, Blockchain, and Internet of Things	2019	Int J Environ Res Public Health	16	20		3988	10.3390/ijerph16203847	{Bublitz, 2019 #3988}	Yes	Link		Main search	PDF	SH	Exclude	7. Wrong time period	Pre-2020	PDF	CT	Exclude	7. Wrong time period		Exclude	7. Wrong time period
Burgess, Dolan, Poon, Jenneson, Pontin, Sivill, Morris, Skatova	Harnessing digital footprint data for population health: a discussion on collaboration, challenges and opportunities in the UK	2024	BMJ Health Care Inform	31	1		4253	https://doi.org/10.1136/bmjhci-2024-101119	{Burgess, 2024 #4253}	Yes	Link		Main search	PDF	SH	Exclude	1. No relevant information		PDF	CT	Exclude	1. No relevant information		Exclude	1. No relevant information
Burkle, Khorram-Manesh, Goniewicz	Artificial Intelligence Assisted Decision-Making in Current and Future Complex Humanitarian Emergencies	2025	Disaster Med Public Health Prep	19		e64	3989	10.1017/dmp.2025.63	{Burkle, 2025 #3989}	Yes	Link		Main search	PDF	SH	Exclude	1. No relevant information	Used AI to write something about AI - wouldn't class this as relevant information	PDF	CT	Exclude	1. No relevant information		Exclude	1. No relevant information
Burkle, Khorram-Manesh, Goniewicz	Artificial Intelligence Assisted Decision-Making in Current and Future Complex Humanitarian Emergencies - CORRIGENDUM	2025	Disaster Med Public Health Prep	19		e99	3990	10.1017/dmp.2025.107	{Burkle, 2025 #3990}	Yes	Link		Main search	PDF	SH	Exclude	4. Wrong study type	Corrigendum	PDF	CT	Exclude	4. Wrong study type		Exclude	4. Wrong study type
Cai, Ye, Ao, Xu, Chu	Emerging applications of fluorescence excitation-emission matrix with machine learning for water quality monitoring: A systematic review	2025	Water Res	277		123281	3991	10.1016/j.watres.2025.123281	{Cai, 2025 #3991}	Yes	Link		Main search	PDF	SH	Exclude	3. Wrong setting	Water quality	PDF	CT	Exclude	3. Wrong setting		Exclude	3. Wrong setting
Cascini, Beccia, Causio, Muscat, Ricciardi	Editorial: Digitalization for precision healthcare	2022	Front Public Health	10		1078610	4255	https://doi.org/10.3389/fpubh.2022.1078610	{Cascini, 2022 #4255}	Yes	Link		Main search	PDF	SH	Exclude	1. No relevant information		PDF	CT	Exclude	1. No relevant information		Exclude	1. No relevant information
Casheekar, Lahiri, Rath, Prabhakar, Srinivasan	A contemporary review on chatbots, AI-powered virtual conversational agents, ChatGPT: Applications, open challenges and future research directions	2024	Computer Science Review	52			3992	10.1016/j.cosrev.2024.100632	{Casheekar, 2024 #3992}	Yes	Link		Main search	PDF	SH	Exclude	3. Wrong setting	Healthcare	PDF	CT	Exclude	3. Wrong setting		Exclude	3. Wrong setting
Castano Castano	[Artificial intelligence in Public Health: opportunities, ethical challenges and future perspectives]	2025	Rev Esp Salud Publica	99			4256	https://pmc.ncbi.nlm.nih.gov/articles/PMC12128575/	{Castano Castano, 2025 #4256}	Yes	Link		Main search	PDF	SH	Exclude	5. Wrong language	Spanish	PDF	CT	Exclude	5. Wrong language		Exclude	5. Wrong language
Castano	Artificial intelligence in Public Health: opportunities, ethical challenges and future perspectives	2025	Revista Espanola de Salud Publica	99		e202503017	3993	https://pmc.ncbi.nlm.nih.gov/articles/PMC12128575/	{Castano, 2025 #3993}	Yes	Link		Main search	PDF	SH	Exclude	5. Wrong language	Spanish	PDF	CT	Exclude	5. Wrong language		Exclude	5. Wrong language
Castaño	Artificial intelligence in Public Health: opportunities, ethical challenges and future perspectives	2025	Revista Espanola de Salud Publica	99			3994	https://pmc.ncbi.nlm.nih.gov/articles/PMC12128575/	{Castaño, 2025 #3994}	Yes	Link		Main search	PDF	SH	Exclude	0. Duplicate		PDF	CT	Exclude	0. Duplicate		Exclude	0. Duplicate
Chai, Lines, Gucciardi, Ng	Research Screener: a machine learning tool to semi-automate abstract screening for systematic reviews	2021	Syst Rev	10	1	93	3995	10.1186/s13643-021-01635-3	{Chai, 2021 #3995}	Yes	Link		Main search	PDF	SH	Include		Reviews	PDF	CT	Include			Include
Chaikijurajai, Laffin, Tang	Artificial Intelligence and Hypertension: Recent Advances and Future Outlook	2020	Am J Hypertens	33	11	967-974	3996	10.1093/ajh/hpaa102	{Chaikijurajai, 2020 #3996}	Yes	Link		Main search	PDF	SH	Exclude	3. Wrong setting	Healthcare	PDF	CT	Exclude	3. Wrong setting		Exclude	3. Wrong setting
Chan, Chang	Big Data, Decision Models, and Public Health	2020	Int J Environ Res Public Health	17	18	1 EP - 7	3997	10.3390/ijerph17186723	{Chan, 2020 #3997}	Yes	Link		Main search	PDF	SH	Exclude	1. No relevant information		PDF	CT	Exclude	1. No relevant information		Exclude	1. No relevant information
Chang, Angelopoulou	Editorial: Women in AI medicine and public health 2022	2023	Front Big Data	6		1303367	3998	10.3389/fdata.2023.1303367	{Chang, 2023 #3998}	Yes	Link		Main search	PDF	SH	Exclude	3. Wrong setting	Healthcare	PDF	CT	Exclude	3. Wrong setting		Exclude	3. Wrong setting
Chassang, Beranger, Rial-Sebbag	The Emergence of AI in Public Health Is Calling for Operational Ethics to Foster Responsible Uses	2025	Int J Environ Res Public Health	22	4		3999	10.3390/ijerph22040568	{Chassang, 2025 #3999}	Yes	Link		Main search	PDF	SH	Include		Ethics	PDF	CT	Include			Include
Chen, Yu, Chamouni, Wang, Li	Integrating machine learning and artificial intelligence in life-course epidemiology: pathways to innovative public health solutions	2024	BMC Med	22	1	354	4002	10.1186/s12916-024-03566-x	{Chen, 2024 #4002}	Yes	Link		Main search	PDF	SH	Exclude	3. Wrong setting	Epidemiology	PDF	CT	Exclude	3. Wrong setting		Exclude	3. Wrong setting
Chen, Maguire, McCoy, Thomas, Reynolds	Reimagining Resilience in Aging: Leveraging AI/ML, Big Data Analytics, and Systems Innovation	2025	Am J Geriatr Psychiatry	33	9	1005-1017	4000	10.1016/j.jagp.2025.05.007	{Chen, 2025 #4000}	Yes	Link		Main search	PDF	SH	Exclude	3. Wrong setting	Healthcare, and aging	PDF	CT	Exclude	3. Wrong setting		Exclude	3. Wrong setting
Chen, Bai	Artificial intelligence technology in ophthalmology public health: current applications and future directions	2025	Front Cell Dev Biol	13		1576465	4001	10.3389/fcell.2025.1576465	{Chen, 2025 #4001}	Yes	Link		Main search	PDF	SH	Exclude	3. Wrong setting	Healthcare	PDF	CT	Exclude		Consensussed: 06 May	Exclude	3. Wrong setting
Chiavegatto Filho, Batista, Dos Santos	Data Leakage in Health Outcomes Prediction With Machine Learning. Comment on "Prediction of Incident Hypertension Within the Next Year: Prospective Study Using Statewide Electronic Health Records and Machine Learning"	2021	J Med Internet Res	23	2	e10969	4003	10.2196/10969	{Chiavegatto Filho, 2021 #4003}	Yes	Link		Main search	PDF	SH	Exclude	3. Wrong setting	Healthcare	PDF	CT	Exclude	3. Wrong setting		Exclude	3. Wrong setting
Chumachenko, Morita, Ghaffarian, Chumachenko	Editorial: Artificial intelligence solutions for global health and disaster response: challenges and opportunities	2024	Front Public Health	12		1439914	4004	10.3389/fpubh.2024.1439914	{Chumachenko, 2024 #4004}	Yes	Link		Main search	PDF	SH	Exclude	4. Wrong study type	Editorial summarising papers in an issue (also, most papers only relevant to healthcare)	PDF	CT	Exclude	4. Wrong study type		Exclude	4. Wrong study type
Chun, Yi, Li, Wu	Internet public opinion monitoring in public health emergencies may benefit from artificial intelligence	2021	Medical Data Mining	4	3		4090	10.53388/mdm2021063009	{Chun, 2021 #4090}	Yes	Link		Main search	PDF	SH	Include		PH communication	PDF	CT	Include			Include
Church, Schoene, Ortega, Chandrasekar, Kordoni	Emerging trends: Unfair, biased, addictive, dangerous, deadly, and insanely profitable	2022	Natural Language Engineering	29	2	483-508	4005	10.1017/s1351324922000481	{Church, 2022 #4005}	Yes	Link		Main search	PDF	SH	Exclude	1. No relevant information		PDF	CT	Exclude	1. No relevant information		Exclude	1. No relevant information
Citrome	Artificial Intelligence and the potential for Garbage In, Garbage Out	2024	Curr Med Res Opin	40	1	2025-02-01	4006	10.1080/03007995.2023.2286785	{Citrome, 2024 #4006}	Yes	Link		Main search	PDF	SH	Exclude	1. No relevant information		PDF	CT	Exclude	1. No relevant information		Exclude	1. No relevant information
Cochlin, Curran, Schmit	Unlocking Public Health Data: Navigating New Legal Guardrails and Emerging AI Challenges	2024	J Law Med Ethics	52	S1	70-74	4007	10.1017/jme.2024.40	{Cochlin, 2024 #4007}	Yes	Link		Main search	PDF	SH	Include		General PH	PDF	CT	Include			Include
Çolak	Future projections of elderly obesity in the United States using time series models	2025	Obesity Medicine	56		100627	4008	10.1016/j.obmed.2025.100627	{Çolak, 2025 #4008}	Yes	Link		Main search	PDF	SH	Include		Non-infectious forecasting	PDF	CT	Include			Include
Comartin, Victor, Kheibari, Ahmedani, Hedden-Clayton, Jones, Miller, Johnson, Weinstock, Kubiak	Suicide Risk Screening in Jails: Protocol for a Pilot Study Leveraging the Mental Health Research Network Algorithm and Health Care Data	2025	JMIR Res Protoc	14		e68517	4265	https://doi.org/10.2196/68517	{Comartin, 2025 #4265}	Yes	Link		Main search	PDF	SH	Exclude	3. Wrong setting	Healthcare - individual-level suicide risk prediction	PDF	CT	Exclude	3. Wrong setting		Exclude	3. Wrong setting
Comulada, McQueen, Lang	Empowering tomorrow's public health researchers and clinicians to develop digital health interventions using chatbots, virtual reality, and other AI technologies	2025	Front Public Health	13		1577076	4009	10.3389/fpubh.2025.1577076	{Comulada, 2025 #4009}	Yes	Link		Main search	PDF	SH	Exclude	1. No relevant information	Details about a PH course on AI	PDF	CT	Exclude	1. No relevant information		Exclude	1. No relevant information
Cordeiro	Artificial Intelligence and Precision Public Health: A Balancing Act of Scientific Accuracy, Social Responsibility, and Community Engagement	2024	Port J Public Health	42	1	2025-05-01	4010	10.1159/000538141	{Cordeiro, 2024 #4010}	Yes	Link		Main search	PDF	SH	Include		General PH	PDF	CT	Include			Include
Cortes, Aluh, Fronteira, Gil, Aguiar	Sixth wave of global public health progress	2025	One Health	20		101015	4011	10.1016/j.onehlt.2025.101015	{Cortes, 2025 #4011}	Yes	Link		Main search	PDF	SH	Exclude	1. No relevant information		PDF	CT	Exclude	1. No relevant information		Exclude	1. No relevant information
Cosma, Radi, Cattano, Zanobini, Bonaccorsi, Lorini, Del Riccio	Potential role of ChatGPT in simplifying and improving informed consent forms for vaccination: a pilot study conducted in Italy	2025	BMJ Health Care Inform	32	1	e101248	4012	10.1136/bmjhci-2024-101248	{Cosma, 2025 #4012}	Yes	Link		Main search	PDF	SH	Exclude	3. Wrong setting	Vaccination consent form writing with chatGPT	PDF	CT	Exclude	3. Wrong setting		Exclude	3. Wrong setting
da Silva, Lima, Haddad, Gross Galiano, Garcia Saiso, Lou Valdez, Fitzgerald, Teixeira, Bascolo, Rodriguez, McInnis, Sanjuan, Marti, Luna, Kohan, D'Agostino	From national and regional commitments to global impact: artificial intelligence for equitable public health at the G20	2024	Rev Panam Salud Publica	48		e73	4013	10.26633/RPSP.2024.73	{da Silva, 2024 #4013}	Yes	Link		Main search	PDF	SH	Exclude	3. Wrong setting	Healthcare	PDF	CT	Exclude	3. Wrong setting		Exclude	3. Wrong setting
Dalvi, Kotwadekar, Kalghatgi, Madhu, Methildeotare	Exploring the Current Applications and Future Implications of Artificial Intelligence in Public Health Dentistry: A Narrative Review	2025	Journal of Clinical and Diagnostic Research	19	7	ZE06 EP - ZE09	4014	10.7860/jcdr/2025/79795.21274	{Dalvi, 2025 #4014}	Yes	Link		Main search	PDF	SH	Include		Dentistry	PDF	CT	Include			Include
Darginavicius, Vencloviene, Dobozinskas, Vaitkaitiene, Vaitkaitis, Pranskunas, Krikscionaitiene	AI-Enabled Public Surveillance Cameras for Rapid Emergency Medical Service Activation in Out-of-Hospital Cardiac Arrests	2023	Curr Probl Cardiol	48	11	101915	4015	10.1016/j.cpcardiol.2023.101915	{Darginavicius, 2023 #4015}	Yes	Link		Main search	PDF	SH	Exclude	3. Wrong setting	Fall detection	PDF	CT	Exclude	3. Wrong setting		Exclude	3. Wrong setting
Das, Altemimi, Nath, Katyal, Kesavan, Rustagi, Panda, Avula, Nayak, Mohanta	Recent advances on artificial intelligence-based approaches for food adulteration and fraud detection in the food industry: Challenges and opportunities	2025	Food Chem	468		142439	4016	10.1016/j.foodchem.2024.142439	{Das, 2025 #4016}	Yes	Link		Main search	PDF	SH	Exclude	3. Wrong setting	Food quality	PDF	CT	Exclude	3. Wrong setting		Exclude	3. Wrong setting
Davies, Wilson, Winder, Tunster, McVicar, Thakrar, Williams, Reid	ChatGPT sits the DFPH exam: large language model performance and potential to support public health learning	2023	medRxiv				4018	10.1101/2023.07.04.23291894	{Davies, 2023 #4018}	Yes	Link		Main search	PDF	SH	Exclude	1. No relevant information	Preprint of #4017	PDF	CT	Exclude	1. No relevant information		Exclude	1. No relevant information
Davies, Wilson, Winder, Tunster, McVicar, Thakrar, Williams, Reid	ChatGPT sits the DFPH exam: large language model performance and potential to support public health learning	2024	BMC Med Educ	24	1	57	4017	10.1186/s12909-024-05042-9	{Davies, 2024 #4017}	Yes	Link		Main search	PDF	SH	Exclude	1. No relevant information		PDF	CT	Exclude	1. No relevant information		Exclude	1. No relevant information
De la Torre, Min, Lee, Kang	The Application of Preventive Medicine in the Future Digital Health Era	2025	J Med Internet Res	27		e59165	4271	https://doi.org/10.2196/59165	{De la Torre, 2025 #4271}	Yes	Link		Main search	PDF	SH	Exclude	3. Wrong setting	Healthcare	PDF	CT	Exclude	3. Wrong setting		Exclude	3. Wrong setting
de Lima, Sinclair, Megger, Maciel, Vasconcelos, Quaresma	Artificial intelligence challenges in the face of biological threats: emerging catastrophic risks for public health	2024	Front Artif Intell	7		1382356	4019	10.3389/frai.2024.1382356	{de Lima, 2024 #4019}	Yes	Link		Main search	PDF	SH	Exclude	4. Wrong study type	Just risks: not potential uses	PDF	CT	Exclude	4. Wrong study type		Exclude	4. Wrong study type
Demir, Yegin	Artificial intelligence: its potential in personalized public health strategies and genetic data analysis: a narrative review	2025	Per Med	22	3	171-179	4020	10.1080/17410541.2025.2494501	{Demir, 2025 #4020}	No	Link	Demir-2025-4020	Main search		SH	Exclude	4. Wrong study type	I'd say this was individual health, not public health, given the aim of individual risk prediction		CT	Exclude	4. Wrong study type	No PDF - decide based on abstract	Exclude	4. Wrong study type
Deng, Cao, Horn	Emerging Applications of Machine Learning in Food Safety	2021	Annu Rev Food Sci Technol	12		513-538	4021	10.1146/annurev-food-071720-024112	{Deng, 2021 #4021}	Yes	Link		Main search	PDF	SH	Exclude	3. Wrong setting	Food safety	PDF	CT	Exclude	3. Wrong setting		Exclude	3. Wrong setting
Dobolyi, Hussain, McPeak	Predicting the Utility of Scientific Articles for Emerging Pandemics Using Their Titles and Natural Language Processing	2024	Disaster Med Public Health Prep	18		e103	4022	10.1017/dmp.2024.109	{Dobolyi, 2024 #4022}	Yes	Link		Main search	PDF	SH	Include		Reviews	PDF	CT	Include			Include
Dritsakis, Gallos, Psomiadi, Amditis, Dionysiou	Data Analytics to Support Policy Making for Noncommunicable Diseases: Scoping Review	2024	Online J Public Health Inform	16		e59906	4276	https://doi.org/10.2196/59906	{Dritsakis, 2024 #4276}	Yes	Link		Main search	PDF	SH	Include			PDF	CT	Include			Include
Du, Xu, Song, Tao	Leveraging machine learning-based approaches to assess human papillomavirus vaccination sentiment trends with Twitter data	2017	BMC Med Inform Decis Mak	17	Suppl 2	69	4023	10.1186/s12911-017-0469-6	{Du, 2017 #4023}	Yes	Link		Main search	PDF	SH	Exclude	7. Wrong time period	Pre-2020	PDF	CT	Exclude	7. Wrong time period		Exclude	7. Wrong time period
Dubey, Keswani, Dubey, Keswani, Bhagat	Innovative IoT-enabled mask detection system: A hybrid deep learning approach for public health applications	2025	MethodsX	14		103291	4024	10.1016/j.mex.2025.103291	{Dubey, 2025 #4024}	Yes	Link		Main search	PDF	SH	Include		Face mask detection	PDF	CT	Include			Include
Dwivedi, Hughes, Ismagilova, Aarts, Coombs, Crick, Duan, Dwivedi, Edwards, Eirug, Galanos, Ilavarasan, Janssen, Jones, Kar, Kizgin, Kronemann, Lal, Lucini, Medaglia, Le Meunier-FitzHugh, Le Meunier-FitzHugh, Misra, Mogaji, Sharma, Singh, Raghavan, Raman, Rana, Samothrakis, Spencer, Tamilmani, Tubadji, Walton, Williams	Artificial Intelligence (AI): Multidisciplinary perspectives on emerging challenges, opportunities, and agenda for research, practice and policy	2021	International Journal of Information Management	57			4025	10.1016/j.ijinfomgt.2019.08.002	{Dwivedi, 2021 #4025}	Yes	Link		Main search	PDF	SH	Exclude	3. Wrong setting	Not PH-specific	PDF	CT	Exclude	3. Wrong setting		Exclude	3. Wrong setting
Dzau, Laitner, Shambaugh	Strategic imperatives for health in the USA: a roadmap for the incoming presidential administration	2024	Lancet	404	10469	2371-2379	4280	https://doi.org/10.1016/S0140-6736(24)02189-5	{Dzau, 2024 #4280}	Yes	Link		Main search	PDF	SH	Exclude	1. No relevant information		PDF	CT	Exclude	1. No relevant information		Exclude	1. No relevant information
Dzinamarira, Mbunge, Chingombe, Cuadros, Moyo, Chitungo, Murewanhema, Muchemwa, Rwibasira, Mugurungi, Musuka, Herrera	Using machine learning models to plan HIV services: Emerging opportunities in design, implementation and evaluation	2024	S Afr Med J	114	6b	e1439	4026	10.7196/SAMJ.2024.v114i6b.1439	{Dzinamarira, 2024 #4026}	Yes	Link		Main search	PDF	SH	Exclude	3. Wrong setting	Healthcare settings	PDF	CT	Exclude	3. Wrong setting		Exclude	3. Wrong setting
Edinger, Valdez, Walsh-Buhi, Bollen	Deep learning for topical trend discovery in online discourse about Pre-Exposure Prophylaxis (PrEP)	2023	AIDS Behav	27	2	443-453	4027	10.1007/s10461-022-03779-2	{Edinger, 2023 #4027}	Yes	Link		Main search	PDF	SH	Include		PrEP sentiment	PDF	CT	Include			Include
El Mghouchi, Udristioiu	On the Prediction and Forecasting of PMs and Air Pollution: An Application of Deep Hybrid AI-Based Models	2025	Applied Sciences	15	15		4028	10.3390/app15158254	{El Mghouchi, 2025 #4028}	Yes	Link		Main search	PDF	SH	Exclude	3. Wrong setting	Pollution	PDF	CT	Exclude	3. Wrong setting		Exclude	3. Wrong setting
Esmaeilyfard, Bayati	Enhancing AI-driven forecasting of diabetes burden: a comparative analysis of deep learning and statistical models	2025	Sci Rep	15	1	29137	4029	10.1038/s41598-025-14599-4	{Esmaeilyfard, 2025 #4029}	Yes	Link		Main search	PDF	SH	Include		Non-infectious forecasting	PDF	CT	Include			Include
Etholén, Roos, Hänninen, Bouri, Kulmala, Rahkonen, Kouvonen, Lallukka	Forecasting cognitive functioning: an artificial intelligence approach with Dynamic Bayesian Networks	2024	European Journal of Public Health	34	Supplement_3		4030	10.1093/eurpub/ckae144.593	{Etholén, 2024 #4030}	Yes	Link		Main search	PDF	SH	Exclude	4. Wrong study type	Conference abstract	PDF	CT	Exclude	4. Wrong study type		Exclude	4. Wrong study type
Fahad	Evaluating the role of artificial intelligence in modern public health: A future-oriented analysis of medical social work practices	2025	Artificial Intelligence in Biomedical and Modern Healthcare Informatics			2025-12-01	4031	10.1016/b978-0-443-21870-5.00001-7	{Fahad, 2025 #4031}	Yes	Link		Main search	PDF	SH	Exclude	4. Wrong study type	Book	PDF	CT	Exclude	4. Wrong study type		Exclude	4. Wrong study type
Fant, Adelman	Building Community Resilience in Support of Public Health Emergency Preparedness with Big Data and AI	2022	Comput Inform Nurs	40	12	836-840	4032	10.1097/CIN.0000000000000869	{Fant, 2022 #4032}	Yes	Link		Main search	PDF	SH	Include			PDF	CT	Include			Include
Feretzakis, Theodorakis, Vamvakou, Hitas, Anagnostou, Kalantzi, Spyridaki, Kollia, Christodoulou, Kalles, Gkontzis, Verykios, Nikolaou	Advancing Cardiovascular Mortality Trend Analysis: A Machine Learning Approach to Predict Future Health Policy Needs	2024	Stud Health Technol Inform	316		868-872	4033	10.3233/SHTI240549	{Feretzakis, 2024 #4033}	Yes	Link		Main search	PDF	SH	Include		Non-infectious forecasting	PDF	CT	Include			Include
Fernández-Avilés, Mattera, Scepi	Factor-Augmented Autoregressive Neural Network to forecast NOx in the city of Madrid	2024	Socio-Economic Planning Sciences	95			4034	10.1016/j.seps.2024.101958	{Fernández-Avilés, 2024 #4034}	Yes	Link		Main search	PDF	SH	Exclude	3. Wrong setting	Pollution	PDF	CT	Exclude	3. Wrong setting		Exclude	3. Wrong setting
Friele, Brockerhoff, Frohlich, Spiecker Genannt Dohmann, Woopen	[Digital data for more efficient prevention: ethical and legal considerations regarding potentials and risks]	2020	Bundesgesundheitsblatt Gesundheitsforschung Gesundheitsschutz	63	6	741-748	4289	https://doi.org/10.1007/s00103-020-03147-2	{Friele, 2020 #4289}	Yes	Link		Main search	PDF	SH	Exclude	5. Wrong language	German	PDF	CT	Exclude	5. Wrong language		Exclude	5. Wrong language
Gadjiev, Novikova, Shcherbakova, Panteleeva, Moiseeva, Gazgireev, Osin	Innovations in arterial blood pressure management: enhancing public health through effective prevention methods	2024	Revista Latinoamericana de Hipertension	19	6	277 EP - 282	4035	https://dx.doi.org/10.5281/zenodo.12674070	{Gadjiev, 2024 #4035}	Yes	Link		Main search	PDF	SH	Exclude	3. Wrong setting	Healthcare	PDF	CT	Exclude	3. Wrong setting		Exclude	3. Wrong setting
Gao	The role of artificial intelligence in enhancing sports education and public health in higher education: innovations in teaching models, evaluation systems, and personalized training	2025	Front Public Health	13		1554911	4036	10.3389/fpubh.2025.1554911	{Gao, 2025 #4036}	Yes	Link		Main search	PDF	SH	Include		Health promotion	PDF	CT	Include			Include
Gendy, Rathnayaka, Curtis, Stewardson, Yuce	Future Prediction of Close Contacts in IoT-Based Contact Tracing System Using a New Real-Life Dataset	2025	IEEE J Biomed Health Inform	29	4	2388-2399	4037	10.1109/JBHI.2023.3331943	{Gendy, 2025 #4037}	Yes	Link		Main search	PDF	SH	Exclude	3. Wrong setting	Outbreaks (contact tracing)	PDF	CT	Exclude	3. Wrong setting		Exclude	3. Wrong setting
Georgescu, Moldovanu, Iticescu, Calmuc, Calmuc, Topa, Moraru	Assessing and forecasting water quality in the Danube River by using neural network approaches	2023	Sci Total Environ	879		162998	4038	10.1016/j.scitotenv.2023.162998	{Georgescu, 2023 #4038}	Yes	Link		Main search	PDF	SH	Exclude	3. Wrong setting	Water quality	PDF	CT	Exclude	3. Wrong setting		Exclude	3. Wrong setting
Ghanimi, Ayasrah, Jadala, T C, K, B	An Innovative Artificial Intelligence Based Decision Making System for Public Health Crisis Virtual Reality Rehabilitation	2025	Journal of Machine and Computing	5	1	561-575	4039	10.53759/7669/jmc202505044	{Ghanimi, 2025 #4039}	Yes	Link		Main search	PDF	SH	Exclude	3. Wrong setting	Healthcare	PDF	CT	Exclude	3. Wrong setting		Exclude	3. Wrong setting
Giabbanelli, MacEwan	Leveraging Artificial Intelligence and Participatory Modeling to Support Paradigm Shifts in Public Health: An Application to Obesity and Evidence-Based Policymaking	2024	Information	15	2		4040	10.3390/info15020115	{Giabbanelli, 2024 #4040}	Yes	Link		Main search	PDF	SH	Exclude	1. No relevant information		PDF	CT	Exclude	1. No relevant information	Hoped this might be an include, but strugged to find any risks...	Exclude	1. No relevant information
Giansanti	Artificial Intelligence in Public Health: Current Trends and Future Possibilities	2022	Int J Environ Res Public Health	19	19		4041	10.3390/ijerph191911907	{Giansanti, 2022 #4041}	Yes	Link		Main search	PDF	SH	Exclude	1. No relevant information		PDF	CT	Exclude	1. No relevant information		Exclude	1. No relevant information
Giansanti, Costantini	Artificial Intelligence in Public Health: Bridging Today's Trends with Tomorrow's Possibilities	2025	Bioengineering (Basel)	12	6		4042	10.3390/bioengineering12060559	{Giansanti, 2025 #4042}	Yes	Link		Main search	PDF	SH	Exclude	1. No relevant information	Editorial	PDF	CT	Exclude	1. No relevant information		Exclude	1. No relevant information
Gingerich, Bielicki, Hood, Le, Rayo	ML/AI, Data Science, and Exposure Science: Lessons Learned from Engagement with Communities and Public Health/Policy Planning for the Future	2024	Annals of Epidemiology	97		73	4043	10.1016/j.annepidem.2024.07.022	{Gingerich, 2024 #4043}	Yes	Link		Main search	PDF	SH	Exclude	3. Wrong setting	Air pollution	PDF	CT	Exclude	3. Wrong setting		Exclude	3. Wrong setting
Goldsmith, Sun, Fried, Wing, Miller, Berhane	The Emergence and Future of Public Health Data Science	2021	Public Health Rev	42		1604023	4296	https://doi.org/10.3389/phrs.2021.1604023	{Goldsmith, 2021 #4296}	Yes	Link		Main search	PDF	SH	Exclude	1. No relevant information		PDF	CT	Exclude	1. No relevant information		Exclude	1. No relevant information
Golinelli, Bucci, Toscano, Filicori, Fantini	Real and predicted mortality under health spending constraints in Italy: a time trend analysis through artificial neural networks	2018	BMC Health Serv Res	18	1	671	4044	10.1186/s12913-018-3473-3	{Golinelli, 2018 #4044}	Yes	Link		Main search	PDF	SH	Exclude	3. Wrong setting	Healthcare	PDF	CT	Exclude	3. Wrong setting		Exclude	3. Wrong setting
Guikema	Artificial Intelligence for Natural Hazards Risk Analysis: Potential, Challenges, and Research Needs	2020	Risk Anal	40	6	1117-1123	4045	10.1111/risa.13476	{Guikema, 2020 #4045}	Yes	Link		Main search	PDF	SH	Exclude	3. Wrong setting	Natural hazards	PDF	CT	Exclude	3. Wrong setting		Exclude	3. Wrong setting
Gunnes, Loe, Kalseth	Exploring the impact of information and communication technologies on loneliness and social isolation in community-dwelling older adults: a scoping review of reviews	2024	BMC Geriatr	24	1	215	4298	https://doi.org/10.1186/s12877-024-04837-1	{Gunnes, 2024 #4298}	Yes	Link		Main search	PDF	SH	Exclude	1. No relevant information		PDF	CT	Exclude	1. No relevant information		Exclude	1. No relevant information
Guo, He, Li, Li, Meng, Hou, Liu, Chen	Air Pollution Forecasting Using Artificial and Wavelet Neural Networks with Meteorological Conditions	2020	Aerosol and Air Quality Research	20	6	1429-1439	4046	10.4209/aaqr.2020.03.0097	{Guo, 2020 #4046}	Yes	Link		Main search	PDF	SH	Exclude	3. Wrong setting	Air pollution	PDF	CT	Exclude	3. Wrong setting		Exclude	3. Wrong setting
Gupta, Gupta	Tobacco control initiatives: current scenario and SWOT (strengths, weaknesses, opportunities and threats) analysis	2025	Discover Public Health	22	1	488	4300	https://doi.org/10.1186/s12982-025-00889-9	{Gupta, 2025 #4300}	Yes	Link		Main search	PDF	SH	Exclude	1. No relevant information	Vague reference to AI and other modern technologies maybe improving smoking cessation interventions, but no uses of AI specifically	PDF	CT	Exclude	1. No relevant information		Exclude	1. No relevant information
Gwalani, Tiwari, O’Neill Ii, Mikler	Creating contiguous service areas around points of dispensing for resource distribution during bio-emergencies	2022	GeoInformatica	27	3	461-490	4301	https://doi.org/10.1007/s10707-022-00462-5	{Gwalani, 2022 #4301}	Yes	Link		Main search	PDF	SH	Exclude	1. No relevant information	Not AI (greedy heuristic algorithms aren't machine learning)	PDF	CT	Exclude	1. No relevant information		Exclude	1. No relevant information
Haley	The Impact of Biometric Surveillance on Reducing Violent Crime: Strategies for Apprehending Criminals While Protecting the Innocent	2025	Sensors (Basel)	25	10		4302	https://doi.org/10.3390/s25103160	{Haley, 2025 #4302}	Yes	Link		Main search	PDF	SH	Exclude	3. Wrong setting	Criminality	PDF	CT	Exclude	3. Wrong setting		Exclude	3. Wrong setting
Hamel, Hersi, Kelly, Tricco, Straus, Wells, Pham, Hutton	Guidance for using artificial intelligence for title and abstract screening while conducting knowledge syntheses	2021	BMC Med Res Methodol	21	1	285	4047	10.1186/s12874-021-01451-2	{Hamel, 2021 #4047}	Yes	Link		Main search	PDF	SH	Include		Reviews	PDF	CT	Include			Include
Han, Lam, Li, Zhang	A Domain-Specific Bayesian Deep-Learning Approach for Air Pollution Forecast	2022	IEEE Transactions on Big Data	8	4	1034-1046	4048	10.1109/tbdata.2020.3005368	{Han, 2022 #4048}	Yes	Link		Main search	PDF	SH	Exclude	3. Wrong setting	Air pollution	PDF	CT	Exclude	3. Wrong setting		Exclude	3. Wrong setting
Haneef, Delnord, Vernay, Bauchet, Gaidelyte, Van Oyen, Or, Perez-Gomez, Palmieri, Achterberg, Tijhuis, Zaletel, Mathis-Edenhofer, Majek, Haaheim, Tolonen, Gallay	Innovative use of data sources: a cross-sectional study of data linkage and artificial intelligence practices across European countries	2020	Arch Public Health	78		55	4049	10.1186/s13690-020-00436-9	{Haneef, 2020 #4049}	Yes	Link		Main search	PDF	SH	Exclude	1. No relevant information		PDF	CT	Exclude	1. No relevant information		Exclude	1. No relevant information
Harrison, Butfield, Yarnoff, Yang	Modeling the potential public health and economic impact of different COVID-19 booster dose vaccination strategies with an adapted vaccine in the United Kingdom	2024	Expert Rev Vaccines	23	1	730-739	4050	10.1080/14760584.2024.2383343	{Harrison, 2024 #4050}	Yes	Link		Main search	PDF	SH	Exclude	1. No relevant information		PDF	CT	Exclude	1. No relevant information		Exclude	1. No relevant information
Hartung, Deng, Mall, Frangi, Emmert-Streib, Pham	Editorial: Insights in AI: Medicine and public health 2022	2023	Front Artif Intell	6		1166426	4051	10.3389/frai.2023.1166426	{Hartung, 2023 #4051}	Yes	Link		Main search	PDF	SH	Exclude	1. No relevant information		PDF	CT	Exclude	1. No relevant information		Exclude	1. No relevant information
Hattab, Irrgang, Korber, Kuhnert, Ladewig	The Way Forward to Embrace Artificial Intelligence in Public Health	2025	Am J Public Health	115	2	123-128	4052	10.2105/AJPH.2024.307888	{Hattab, 2025 #4052}	Yes	Link		Main search	PDF	SH	Include		Ways to embrace AI (risk mitigation)	PDF	CT	Include			Include
Hocking, Parkinson, Adams, Molding Nielsen, Ang, de Carvalho Gomes	Overcoming the challenges of using automated technologies for public health evidence synthesis	2023	Euro Surveill	28	45		4053	10.2807/1560-7917.ES.2023.28.45.2300183	{Hocking, 2023 #4053}	Yes	Link		Main search	PDF	SH	Exclude	1. No relevant information		PDF	CT	Exclude	1. No relevant information		Exclude	1. No relevant information
Hodge, Piatt, White, Gostin	Public Health Legal Protections in an Era of Artificial Intelligence	2024	Am J Public Health	114	6	559-563	4054	10.2105/AJPH.2024.307619	{Hodge, 2024 #4054}	Yes	Link		Main search	PDF	SH	Exclude	1. No relevant information	Risks only	PDF	CT	Exclude	1. No relevant information		Exclude	1. No relevant information
Holliday, Zhang	Machine learning-enabled colorimetric sensors for foodborne pathogen detection	2024	Adv Food Nutr Res	111		179-213	4055	10.1016/bs.afnr.2024.06.004	{Holliday, 2024 #4055}	Yes	Link		Main search	PDF	SH	Exclude	4. Wrong study type	Book	PDF	CT	Exclude	4. Wrong study type		Exclude	4. Wrong study type
Homayouni, Hong, Manda, Nanduri, Toby	Editorial: Unleashing Innovation on Precision Public Health-Highlights From the MCBIOS and MAQC 2021 Joint Conference	2022	Front Artif Intell	5		859700	4308	https://doi.org/10.3389/frai.2022.859700	{Homayouni, 2022 #4308}	Yes	Link		Main search	PDF	SH	Exclude	1. No relevant information		PDF	CT	Exclude	1. No relevant information		Exclude	1. No relevant information
Homayouni, Manda, Tan, Qin	Editorial: AI and data science in drug development and public health: Highlights from the MCBIOS 2022 conference	2023	Front Big Data	6		1156811	4056	10.3389/fdata.2023.1156811	{Homayouni, 2023 #4056}	Yes	Link		Main search	PDF	SH	Exclude	1. No relevant information		PDF	CT	Exclude	1. No relevant information		Exclude	1. No relevant information
Hong, Slikker	Integrating artificial intelligence with bioinformatics promotes public health	2023	Exp Biol Med (Maywood)	248	21	1905-1907	4057	10.1177/15353702231223575	{Hong, 2023 #4057}	Yes	Link		Main search	PDF	SH	Exclude	1. No relevant information		PDF	CT	Exclude	1. No relevant information		Exclude	1. No relevant information
Hong, Slikker	Realizing Impact of Artificial Intelligence in Real World Enhances Public Health	2025	Exp Biol Med (Maywood)	250		10700	4058	10.3389/ebm.2025.10700	{Hong, 2025 #4058}	Yes	Link		Main search	PDF	SH	Exclude	1. No relevant information		PDF	CT	Exclude	1. No relevant information		Exclude	1. No relevant information
Hossain, Chowdhury, Khan, Ahmad, Brishty, Rahman, Rahman, Akter, Nitu, Koly, Haque, Mashrur, Imranuzzaman, Akhtar, Mahmud, Alam, Rahman	Emerging Zoonotic Diseases: Epidemiology, Public Health Impact, and the Urgent Need for a Unified “One Health” Approach	2025	The Pakistan Veterinary Journal	45	1	36 EP - 47	4059	10.29261/pakvetj/2025.115	{Hossain, 2025 #4059}	Yes	Link		Main search	PDF	SH	Exclude	1. No relevant information		PDF	CT	Exclude	1. No relevant information		Exclude	1. No relevant information
Houdou, El Badisy, Khomsi, Abdala, Abdulla, Najmi, Obtel, Belyamani, Ibrahimi, Khalis	Interpretable Machine Learning Approaches for Forecasting and Predicting Air Pollution: A Systematic Review	2024	Aerosol and Air Quality Research	24	1		4060	10.4209/aaqr.230151	{Houdou, 2024 #4060}	Yes	Link		Main search	PDF	SH	Exclude	3. Wrong setting	Air pollution	PDF	CT	Exclude	3. Wrong setting		Exclude	3. Wrong setting
Hrust, Klaić, Križan, Antonić, Hercog	Neural network forecasting of air pollutants hourly concentrations using optimised temporal averages of meteorological variables and pollutant concentrations	2009	Atmospheric Environment	43	35	5588-5596	4061	10.1016/j.atmosenv.2009.07.048	{Hrust, 2009 #4061}	Yes	Link		Main search	PDF	SH	Exclude	3. Wrong setting	Air pollution	PDF	CT	Exclude	3. Wrong setting		Exclude	3. Wrong setting
Hung, Baker, Campbell, Tang, Ahmadov, Romero-Alvarez, Li, Schnell	Fire Intensity and spRead forecAst (FIRA): A Machine Learning Based Fire Spread Prediction Model for Air Quality Forecasting Application	2025	Geohealth	9	3	e2024GH001253	4062	10.1029/2024GH001253	{Hung, 2025 #4062}	Yes	Link		Main search	PDF	SH	Exclude	3. Wrong setting	Air pollution	PDF	CT	Exclude	3. Wrong setting		Exclude	3. Wrong setting
Hyun Lim, Hersi, Krishnan, Montroy, Rook, Farrah, Chung, Stevens, Zafack, Wong, Forbes, Killikelly, Young, Tunis	COVID-19 vaccine evidence monitoring assisted by artificial Intelligence: An emergency system implemented by the Public Health Agency of Canada to capture and describe the trajectory of evolving pandemic vaccine literature	2024	Vaccine X	21		100575	4063	10.1016/j.jvacx.2024.100575	{Hyun Lim, 2024 #4063}	Yes	Link		Main search	PDF	SH	Include		Reviews	PDF	CT	Include			Include
Ibragimova, Phagava	Editorial: Governance of emerging health-related technologies	2024	International Journal of Health Governance	29	1	2026-04-01	4314	https://doi.org/10.1108/ijhg-03-2024-161	{Ibragimova, 2024 #4314}	Yes	Link		Main search	PDF	SH	Exclude	1. No relevant information		PDF	CT	Exclude	1. No relevant information		Exclude	1. No relevant information
Jaff	The surge of spreading harmful information through digital technologies: a distressing reality in complex humanitarian emergencies	2023	Lancet Glob Health	11	6	e821-e822	4315	https://doi.org/10.1016/S2214-109X(23)00207-3	{Jaff, 2023 #4315}	Yes	Link		Main search	PDF	SH	Exclude	1. No relevant information	Risks only	PDF	CT	Exclude	1. No relevant information		Exclude	1. No relevant information
Jahani, Dehghanian, Takian	ChatGPT and Refugee's Health: Innovative Solutions for Changing the Game	2024	Int J Public Health	69		1607306	4064	10.3389/ijph.2024.1607306	{Jahani, 2024 #4064}	Yes	Link		Main search	PDF	SH	Exclude	1. No relevant information		PDF	CT	Exclude	1. No relevant information		Exclude	1. No relevant information
Jain, Burke	Falls Prevention Using AI and Remote Surveillance in Nursing Homes	2024	J Am Med Dir Assoc	25	8	2187-09-13	4065	10.1016/j.jamda.2024.105082	{Jain, 2024 #4065}	Yes	Link		Main search	PDF	SH	Exclude	3. Wrong setting	Falls	PDF	CT	Exclude	3. Wrong setting		Exclude	3. Wrong setting
Jardim, Rose, Ames, Echavez, Van de Velde, Muller	Automating risk of bias assessment in systematic reviews: a real-time mixed methods comparison of human researchers to a machine learning system	2022	BMC Med Res Methodol	22	1	167	4066	10.1186/s12874-022-01649-y	{Jardim, 2022 #4066}	Yes	Link		Main search	PDF	SH	Include		Reviews	PDF	CT	Include			Include
Ji, Xie, Huang, Qian	Forecasting the Suitability of Online Mental Health Information for Effective Self-Care Developing Machine Learning Classifiers Using Natural Language Features	2021	Int J Environ Res Public Health	18	19		4067	10.3390/ijerph181910048	{Ji, 2021 #4067}	Yes	Link		Main search	PDF	SH	Exclude	3. Wrong setting	Predicting the suitability of mental health information is a bit too far away from practical public health	PDF	CT	Exclude	3. Wrong setting	Went back and forth on this one, but ultimately probably agree it's a bit of a stretch	Exclude	3. Wrong setting
Kalyanam, Katsuki, G, Mackey	Exploring trends of nonmedical use of prescription drugs and polydrug abuse in the Twittersphere using unsupervised machine learning	2017	Addict Behav	65		289-295	4068	10.1016/j.addbeh.2016.08.019	{Kalyanam, 2017 #4068}	Yes	Link		Main search	PDF	SH	Exclude	7. Wrong time period	Pre-2020	PDF	CT	Exclude	7. Wrong time period		Exclude	7. Wrong time period
Kamel Boulos, Kwan, El Emam, Chung, Gao, Richardson	Reconciling public health common good and individual privacy: new methods and issues in geoprivacy	2022	Int J Health Geogr	21	1	1	4069	10.1186/s12942-022-00300-9	{Kamel Boulos, 2022 #4069}	Yes	Link		Main search	PDF	SH	Exclude	1. No relevant information		PDF	CT	Exclude	1. No relevant information		Exclude	1. No relevant information
Kamitani, Koenig, Sullivan	Transformative potential of artificial intelligence in US CDC HIV interventions: balancing innovation with health privacy	2025	AIDS	39	10	1311-1321	4070	10.1097/QAD.0000000000004220	{Kamitani, 2025 #4070}	Yes	Link		Main search	PDF	SH	Include		Non-infectious forecasting	PDF	CT	Include			Include
Kang, Hanif, Mirza, Khan, Malik	Machine learning in primary care: potential to improve public health	2021	J Med Eng Technol	45	1	75-80	4071	10.1080/03091902.2020.1853839	{Kang, 2021 #4071}	Yes	Link		Main search	PDF	SH	Exclude	3. Wrong setting	Healthcare	PDF	CT	Exclude	3. Wrong setting		Exclude	3. Wrong setting
Khalemsky, Khalemsky, Lankenau, Ataiants, Roth, Marcu, Schwartz	Predictive Dispatch of Volunteer First Responders: Algorithm Development and Validation	2023	JMIR Mhealth Uhealth	11		e41551	4320	https://doi.org/10.2196/41551	{Khalemsky, 2023 #4320}	Yes	Link		Main search	PDF	SH	Include			PDF	CT	Include		Consensussed: 06 May	Include
Khanna	Artificial intelligence: contemporary applications and future compass	2010	Int Dent J	60	4	269-272	4072	10.1922/IDJ_2422Khanna04	{Khanna, 2010 #4072}	Yes	Link		Main search	PDF	SH	Exclude	3. Wrong setting	Healthcare	PDF	CT	Exclude	3. Wrong setting		Exclude	3. Wrong setting
Kianfar, Sartorius, Lau, Bergquist, Kiani	The future of spatial epidemiology in the AI era: enhancing machine learning approaches with explicit spatial structure	2025	Geospat Health	20	1		4073	10.4081/gh.2025.1386	{Kianfar, 2025 #4073}	Yes	Link		Main search	PDF	SH	Exclude	1. No relevant information		PDF	CT	Exclude	1. No relevant information		Exclude	1. No relevant information
Kianfar, Sartorius, Lau, Bergquist, Kiani	The future of spatial epidemiology in the AI era: enhancing machine learning approaches with explicit spatial structure	2025	Geospat Health	20	1		4074	10.4081/gh.2025.1386	{Kianfar, 2025 #4074}	Yes	Link		Main search	PDF	SH	Exclude	0. Duplicate		PDF	CT	Exclude	0. Duplicate		Exclude	0. Duplicate
Klausner	Sexually Transmitted Disease Prevention, Community Engagement, and Innovation	2024	Sex Transm Dis	51	9	585-586	4075	10.1097/OLQ.0000000000002035	{Klausner, 2024 #4075}	Yes	Link		Main search	PDF	SH	Exclude	1. No relevant information		PDF	CT	Exclude	1. No relevant information		Exclude	1. No relevant information
Kokki, Ammon	Preparing Europe for future health threats and crises - key elements of the European Centre for Disease Prevention and Control's reinforced mandate	2023	Euro Surveill	28	3		4323	https://doi.org/10.2807/1560-7917.ES.2023.28.3.2300033	{Kokki, 2023 #4323}	Yes	Link		Main search	PDF	SH	Exclude	1. No relevant information		PDF	CT	Exclude	1. No relevant information		Exclude	1. No relevant information
Kon, Pereira, Molina, Yip, Abisheganaden, Yip	Unravelling ChatGPT's potential in summarising qualitative in-depth interviews	2025	Eye (Lond)	39	2	354-358	4076	10.1038/s41433-024-03419-0	{Kon, 2025 #4076}	Yes	Link		Main search	PDF	SH	Include		Quali research	PDF	CT	Include			Include
Koo, Kwon, Bae, Yun, Choi, Yu, Wang, Koo, Lee, Choi, Lee	A Development of PM2.5 Forecasting System in South Korea Using Chemical Transport Modeling and Machine Learning	2023	Asia-Pacific Journal of Atmospheric Sciences	59	5	577-595	4077	10.1007/s13143-023-00314-8	{Koo, 2023 #4077}	Yes	Link		Main search	PDF	SH	Exclude	3. Wrong setting	Air pollution	PDF	CT	Exclude	3. Wrong setting		Exclude	3. Wrong setting
Kothari, Andreadis, Glynn, Lie-Tjauw, Isbell	Readiness for Public Health Emergency Response: The Foundational Role of a Data Ecosystem	2024	Public Health Rep	139	1	2026-10-05	4326	https://doi.org/10.1177/00333549231166450	{Kothari, 2024 #4326}	Yes	Link		Main search	PDF	SH	Exclude	1. No relevant information		PDF	CT	Exclude	1. No relevant information		Exclude	1. No relevant information
Kumar, Arjunaditya, Singh, Srinivasan, Hu	AI-Powered Blockchain Technology for Public Health: A Contemporary Review, Open Challenges, and Future Research Directions	2022	Healthcare (Basel)	11	1		4078	10.3390/healthcare11010081	{Kumar, 2022 #4078}	Yes	Link		Main search	PDF	SH	Exclude	3. Wrong setting	Healthcare	PDF	CT	Exclude	3. Wrong setting		Exclude	3. Wrong setting
Kuo, Fu	Ozone response modeling to NOx and VOC emissions: Examining machine learning models	2023	Environ Int	176		107969	4079	10.1016/j.envint.2023.107969	{Kuo, 2023 #4079}	Yes	Link		Main search	PDF	SH	Exclude	3. Wrong setting	Air pollution	PDF	CT	Exclude	3. Wrong setting		Exclude	3. Wrong setting
Lacsa, Arroyo	Navigating the path of AI integration in public health: challenges and opportunities	2025	J Public Health (Oxf)	47	1	e146-e147	4080	10.1093/pubmed/fdae117	{Lacsa, 2025 #4080}	Yes	Link		Main search	PDF	SH	Exclude	1. No relevant information		PDF	CT	Exclude	1. No relevant information		Exclude	1. No relevant information
Leal Neto, Von Wyl	Digital Transformation of Public Health for Noncommunicable Diseases: Narrative Viewpoint of Challenges and Opportunities	2024	JMIR Public Health Surveill	10		e49575	4081	10.2196/49575	{Leal Neto, 2024 #4081}	Yes	Link		Main search	PDF	SH	Include		General PH	PDF	CT	Include			Include
Lee, Tyler, Veinot, Yakel	Now Is the Time to Strengthen Government-Academic Data Infrastructures to Jump-Start Future Public Health Crisis Response	2024	JMIR Public Health Surveill	10		e51880	4329	https://doi.org/10.2196/51880	{Lee, 2024 #4329}	Yes	Link		Main search	PDF	SH	Exclude	1. No relevant information		PDF	CT	Exclude	1. No relevant information		Exclude	1. No relevant information
Levin, Budak	Implementation of Public Health Policies and Integration of Artificial Intelligence and Social Media in Dental Traumatology-Cornerstones for Effective Dental Trauma Management	2024	Dent Traumatol	40	6	607-611	4082	10.1111/edt.13013	{Levin, 2024 #4082}	Yes	Link		Main search	PDF	SH	Exclude	1. No relevant information		PDF	CT	Exclude	1. No relevant information		Exclude	1. No relevant information
Li, Cheng, Wu, Wang, Tong, Zhang, Deng, Li	Forecasting of bioaerosol concentration by a Back Propagation neural network model	2020	Sci Total Environ	698		134315	4084	10.1016/j.scitotenv.2019.134315	{Li, 2020 #4084}	Yes	Link		Main search	PDF	SH	Exclude	3. Wrong setting	Air pollution	PDF	CT	Exclude	3. Wrong setting		Exclude	3. Wrong setting
Li, Cheng, Wu, Wang, Tong, Zhang, Deng, Li, Gao	An improved wavelet de-noising-based back propagation neural network model to forecast the bioaerosol concentration	2020	Aerosol Science and Technology	55	3	352-360	4085	10.1080/02786826.2020.1846678	{Li, 2020 #4085}	Yes	Link		Main search	PDF	SH	Exclude	3. Wrong setting	Air pollution	PDF	CT	Exclude	3. Wrong setting		Exclude	3. Wrong setting
Li, Wu, Liu, Qu, Xu, Kuang, Xu	Analysis of food safety based on machine learning: A comprehensive review and future prospects	2025	Food Chem	490		145170	4083	10.1016/j.foodchem.2025.145170	{Li, 2025 #4083}	Yes	Link		Main search	PDF	SH	Exclude	3. Wrong setting	Food safety	PDF	CT	Exclude	3. Wrong setting		Exclude	3. Wrong setting
Liao, Tan, Zhang	Surface Electromyography Combined with Artificial Intelligence in Predicting Neuromuscular Falls in the Elderly: A Narrative Review of Present Applications and Future Perspectives	2025	Healthcare (Basel)	13	10		4086	10.3390/healthcare13101204	{Liao, 2025 #4086}	Yes	Link		Main search	PDF	SH	Exclude	3. Wrong setting	Falls	PDF	CT	Exclude	3. Wrong setting		Exclude	3. Wrong setting
Liaqat, Mushtaq, Jamil, Mushtaq, Ali, Anwar, Raza, Aslam, Tariq, Hussain, Bakht, Bokhari	Mobile Health Interventions: A Frontier for Mitigating the Global Burden of Cardiovascular Disease	2024	Cureus	16	6	e62157	4334	https://doi.org/10.7759/cureus.62157	{Liaqat, 2024 #4334}	Yes	Link		Main search	PDF	SH	Exclude	1. No relevant information		PDF	CT	Exclude	1. No relevant information		Exclude	1. No relevant information
Liberty, Bromage, Peter, Ihedioha, Alsalman, Odogwu	Smart technology for public health: reshaping the future of food safety	2025	Food Control	176			4087	10.1016/j.foodcont.2025.111378	{Liberty, 2025 #4087}	Yes	Link		Main search	PDF	SH	Exclude	3. Wrong setting	Food safety	PDF	CT	Exclude	3. Wrong setting		Exclude	3. Wrong setting
Lieftink, Ribeiro, Kroon, Haringhuizen, Wong, van de Burgwal	The potential of federated learning for public health purposes: a qualitative analysis of GDPR compliance, Europe, 2021	2024	Euro Surveill	29	38		4088	10.2807/1560-7917.ES.2024.29.38.2300695	{Lieftink, 2024 #4088}	Yes	Link		Main search	PDF	SH	Exclude	1. No relevant information		PDF	CT	Exclude	1. No relevant information		Exclude	1. No relevant information
Lilhore, Simaiya, Dalal, Faujdar	Revolutionizing air quality forecasting: Fusion of state-of-the-art deep learning models for precise classification	2025	Urban Climate	59			4089	10.1016/j.uclim.2025.102308	{Lilhore, 2025 #4089}	Yes	Link		Main search	PDF	SH	Exclude	3. Wrong setting	Air pollution	PDF	CT	Exclude	3. Wrong setting		Exclude	3. Wrong setting
Lim, Jang	Leveraging National Health Insurance Service Data for Public Health Research in Korea: Structure, Applications, and Future Directions	2025	J Korean Med Sci	40	8	e111	4337	https://doi.org/10.3346/jkms.2025.40.e111	{Lim, 2025 #4337}	Yes	Link		Main search	PDF	SH	Exclude	3. Wrong setting	Healthcare	PDF	CT	Exclude	3. Wrong setting		Exclude	3. Wrong setting
Liu, Deng	An enhanced hybrid ensemble deep learning approach for forecasting daily PM2.5	2022	Journal of Central South University	29	6	2074-2083	4092	10.1007/s11771-022-5051-4	{Liu, 2022 #4092}	Yes	Link		Main search	PDF	SH	Exclude	3. Wrong setting	Air pollution	PDF	CT	Exclude	3. Wrong setting		Exclude	3. Wrong setting
Liu, Bensimon, Lu	Frontiers of machine learning in smart food safety	2024	Adv Food Nutr Res	111		35-70	4093	10.1016/bs.afnr.2024.06.009	{Liu, 2024 #4093}	Yes	Link		Main search	PDF	SH	Exclude	4. Wrong study type	Book	PDF	CT	Exclude	4. Wrong study type		Exclude	4. Wrong study type
Liu, Zhang, Wang, Bao, Fu, Wang	Promoting active health with AI technologies: Current status and prospects of high-altitude therapy, simulated hypoxia, and LLM-driven lifestyle rehabilitation approaches	2025	Biosci Trends	19	3	252-265	4094	10.5582/bst.2025.01105	{Liu, 2025 #4094}	Yes	Link		Main search	PDF	SH	Include		Obesity	PDF	CT	Include			Include
Lopez-Cortes, Manriquez-Troncoso, Kandalaft-Letelier, Cuadros-Orellana	Machine learning and matrix-assisted laser desorption/ionization time-of-flight mass spectra for antimicrobial resistance prediction: A systematic review of recent advancements and future development	2024	J Chromatogr A	1734		465262	4095	10.1016/j.chroma.2024.465262	{Lopez-Cortes, 2024 #4095}	Yes	Link		Main search	PDF	SH	Exclude	3. Wrong setting	AMR	PDF	CT	Exclude	3. Wrong setting		Exclude	3. Wrong setting
Losch, Zuiderent-Jerak, Kunneman, Syurina, Bongers, Stein, Chan, Willems, Timen	Capturing Emerging Experiential Knowledge for Vaccination Guidelines Through Natural Language Processing: Proof-of-Concept Study	2023	J Med Internet Res	25		e44461	4096	10.2196/44461	{Losch, 2023 #4096}	Yes	Link		Main search	PDF	SH	Include		Vaccine sentiment	PDF	CT	Include			Include
Love, Niu, Labay-Marquez	Artificial Intelligence in Public Health Education: Navigating Ethical Challenges and Empowering the Next Generation of Professionals	2025	Health Promot Pract			1.52484e+16	4097	10.1177/15248399251320989	{Love, 2025 #4097}	Yes	Link		Main search	PDF	SH	Include		PH education	PDF	CT	Include			Include
Lu, Wang, Wang, Yan, Lam	Potential assessment of a neural network model with PCA/RBF approach for forecasting pollutant trends in Mong Kok urban air, Hong Kong	2004	Environ Res	96	1	79-87	4100	10.1016/j.envres.2003.11.003	{Lu, 2004 #4100}	Yes	Link		Main search	PDF	SH	Exclude	3. Wrong setting	Air pollution	PDF	CT	Exclude	3. Wrong setting		Exclude	3. Wrong setting
Lu, Liao, Lei	Applying service design in public services: A scientometric review for innovations in public health and administration	2020				381-384	4343	https://doi.org/10.1109/MSIEID52046.2020.00081	{Lu, 2020 #4343}	Yes	Link		Main search	PDF	SH	Exclude	3. Wrong setting	Healthcare settings (also limited AI outcomes)	PDF	CT	Exclude	3. Wrong setting		Exclude	3. Wrong setting
Lu, Christie, Nguyen, Freeman, Hsu	Applications of Artificial Intelligence and Machine Learning in Disasters and Public Health Emergencies	2022	Disaster Med Public Health Prep	16	4	1674-1681	4099	10.1017/dmp.2021.125	{Lu, 2022 #4099}	Yes	Link		Main search	PDF	SH	Include		Emergencies	PDF	CT	Include			Include
Lu, Lee	Innovative Geo-AI model: An enhance of outdoor PM estimations based on land use and outdoor environmental factors in a highly polluted area	2025	Chemosphere	373		144178	4098	10.1016/j.chemosphere.2025.144178	{Lu, 2025 #4098}	Yes	Link		Main search	PDF	SH	Exclude	3. Wrong setting	Air pollution	PDF	CT	Exclude	3. Wrong setting		Exclude	3. Wrong setting
Luca, Campedelli, Centellegher, Tizzoni, Lepri	Crime, inequality and public health: a survey of emerging trends in urban data science	2023	Front Big Data	6		1124526	4346	https://doi.org/10.3389/fdata.2023.1124526	{Luca, 2023 #4346}	Yes	Link		Main search	PDF	SH	Exclude	1. No relevant information		PDF	CT	Exclude	1. No relevant information		Exclude	1. No relevant information
Luo, Lutsenko, Shulga, Levchenko, Lutsenko	Construction Scheme of Innovative European Urban Digital Public Health Security System Based on Fuzzy Logic, Spectrum Analysis, and Cloud Computing	2023	Lecture Notes in Networks and Systems	693		333-343	4102	10.1007/978-981-99-3243-6_26	{Luo, 2023 #4102}	Yes	Link		Main search	PDF	SH	Exclude	3. Wrong setting	Outbreak (COVID-19)	PDF	CT	Exclude	3. Wrong setting		Exclude	3. Wrong setting
Luo, Chen, Zhu, Wang, Wang, Liu, Lyu, Wang, Wang, Chen	Potential Roles of Large Language Models in the Production of Systematic Reviews and Meta-Analyses	2024	J Med Internet Res	26		e56780	4101	10.2196/56780	{Luo, 2024 #4101}	Yes	Link		Main search	PDF	SH	Include		Reviews	PDF	CT	Include			Include
Luxton, Watson	Intelligent virtual agents for current and emerging public health crises	2024	Resilient Health			281-290	4103	10.1016/b978-0-443-18529-8.00022-6	{Luxton, 2024 #4103}	Yes	Link		Main search	PDF	SH	Exclude	4. Wrong study type	Book	PDF	CT	Exclude	4. Wrong study type		Exclude	4. Wrong study type
Luxton	Technology ethics in healthcare delivery and public health: Current and emerging issues from the COVID-19 era	2024	Resilient Health			193-203	4348	https://doi.org/10.1016/b978-0-443-18529-8.00015-9	{Luxton, 2024 #4348}	Yes	Link		Main search	PDF	SH	Exclude	4. Wrong study type	Book	PDF	CT	Exclude	4. Wrong study type		Exclude	4. Wrong study type
Mackey, Baur, Eysenbach	Advancing Infodemiology in a Digital Intensive Era	2022	JMIR Infodemiology	2	1	e37115	4349	https://doi.org/10.2196/37115	{Mackey, 2022 #4349}	Yes	Link		Main search	PDF	SH	Exclude	1. No relevant information		PDF	CT	Exclude	1. No relevant information		Exclude	1. No relevant information
Madan, Nair, Katariya, Mehta, Gogte	Smart waste management and air pollution forecasting: Harnessing Internet of things and fully Elman neural network	2025	Waste Manag Res	43	8	1193-1205	4104	10.1177/0734242X241313286	{Madan, 2025 #4104}	Yes	Link		Main search	PDF	SH	Exclude	3. Wrong setting	Air pollution	PDF	CT	Exclude	3. Wrong setting		Exclude	3. Wrong setting
Malik, Sircar, Bhat, Ansari, Pande, Kumar, Mathapati, Balasubramanian, Kaushik, Natesan, Ezzikouri, El Zowalaty, Dhama	How artificial intelligence may help the Covid-19 pandemic: Pitfalls and lessons for the future	2021	Rev Med Virol	31	5	2025-11-01	4107	10.1002/rmv.2205	{Malik, 2021 #4107}	Yes	Link		Main search	PDF	SH	Exclude	3. Wrong setting	Outbreak (COVID-19)	PDF	CT	Exclude	3. Wrong setting		Exclude	3. Wrong setting
Mann, Barocas	Bolstering the HIV Surveillance System Through Innovative Methods, Technologic Advances, and Community-Driven Solutions to Inform Intervention Efforts and End the Epidemic	2024	Curr HIV/AIDS Rep	22	1	11	4352	https://doi.org/10.1007/s11904-024-00720-1	{Mann, 2024 #4352}	Yes	Link		Main search	PDF	SH	Exclude	3. Wrong setting	Healthcare	PDF	CT	Exclude	1. No relevant information	Actually thought this was ok in terms of PH context, but likely insufficient info that could be included	Exclude	3. Wrong setting
Marcus, Sewell, Balzer, Krakower	Artificial Intelligence and Machine Learning for HIV Prevention: Emerging Approaches to Ending the Epidemic	2020	Curr HIV/AIDS Rep	17	3	171-179	4108	10.1007/s11904-020-00490-6	{Marcus, 2020 #4108}	Yes	Link		Main search	PDF	SH	Include		HIV prevention	PDF	CT	Include			Include
Marra, Langford, Nori, Bearman	Revolutionizing antimicrobial stewardship, infection prevention, and public health with artificial intelligence: the middle path	2023	Antimicrob Steward Healthc Epidemiol	3	1	e219	4109	10.1017/ash.2023.494	{Marra, 2023 #4109}	Yes	Link		Main search	PDF	SH	Include		General PH	PDF	CT	Include			Include
Masood, Ahmad	A review on emerging artificial intelligence (AI) techniques for air pollution forecasting: Fundamentals, application and performance	2021	Journal of Cleaner Production	322			4110	10.1016/j.jclepro.2021.129072	{Masood, 2021 #4110}	Yes	Link		Main search	PDF	SH	Exclude	3. Wrong setting	Air pollution	PDF	CT	Exclude	3. Wrong setting		Exclude	3. Wrong setting
Matenda, Rip, Marais, Williams	Exploring the potential of hyperspectral imaging for microbial assessment of meat: A review	2024	Spectrochim Acta A Mol Biomol Spectrosc	315		124261	4111	10.1016/j.saa.2024.124261	{Matenda, 2024 #4111}	Yes	Link		Main search	PDF	SH	Exclude	3. Wrong setting	Food safety	PDF	CT	Exclude	3. Wrong setting		Exclude	3. Wrong setting
Mathaba, Banza	A comprehensive review on artificial intelligence in water treatment for optimization. Clean water now and the future	2023	J Environ Sci Health A Tox Hazard Subst Environ Eng	58	14	1047-1060	4112	10.1080/10934529.2024.2309102	{Mathaba, 2023 #4112}	Yes	Link		Main search	PDF	SH	Exclude	3. Wrong setting	Water quality	PDF	CT	Exclude	3. Wrong setting		Exclude	3. Wrong setting
McClure	Intelligence in injury prevention: artificial and otherwise	2020	Inj Prev	26	1	1	4358	https://doi.org/10.1136/injuryprev-2020-043642	{McClure, 2020 #4358}	Yes	Link		Main search	PDF	SH	Exclude	1. No relevant information		PDF	CT	Exclude	1. No relevant information		Exclude	1. No relevant information
McDaniel, Akwafuo, Urbanovsky, Mikler	Benchmarking a fast, satisficing vehicle routing algorithm for public health emergency planning and response: "Good Enough for Jazz"	2023	PeerJ Comput Sci	9		e1541	4113	10.7717/peerj-cs.1541	{McDaniel, 2023 #4113}	Yes	Link		Main search	PDF	SH	Include		Emergencies	PDF	CT	Include			Include
McDaniel, Essien, Lefcourt, Zelleke, Sinha, Chellappa, Abadir	Aging With Artificial Intelligence: How Technology Enhances Older Adults' Health and Independence	2025	J Gerontol A Biol Sci Med Sci	80	7		4114	10.1093/gerona/glaf086	{McDaniel, 2025 #4114}	Yes	Link		Main search	PDF	SH	Include		Aging	PDF	CT	Include		Consensussed: 06 May	Include
Meng, Hand, Schichtel, Liu	Space-time trends of PM(2.5) constituents in the conterminous United States estimated by a machine learning approach, 2005-2015	2018	Environ Int	121	Pt 2	1137-1147	4115	10.1016/j.envint.2018.10.029	{Meng, 2018 #4115}	Yes	Link		Main search	PDF	SH	Exclude	3. Wrong setting	Air pollution	PDF	CT	Exclude	3. Wrong setting		Exclude	3. Wrong setting
Miller, Sehat, Jennings	Leveraging AI for Public Health Communication: Opportunities and Risks	2024	J Public Health Manag Pract	30	4	616-618	4116	10.1097/PHH.0000000000001986	{Miller, 2024 #4116}	Yes	Link		Main search	PDF	SH	Include		Communication	PDF	CT	Include			Include
Moore, Al-Tamimi, Freeman	Investigating the Potential of a Conversational Agent (Phyllis) to Support Adolescent Health and Overcome Barriers to Physical Activity: Co-Design Study	2024	JMIR Form Res	8		e51571	4117	10.2196/51571	{Moore, 2024 #4117}	Yes	Link		Main search	PDF	SH	Include		Physical activity	PDF	CT	Include			Include
Mu, Liao, Li, Qin, Yang	IPSO-LSTM hybrid model for predicting online public opinion trends in emergencies	2023	PLoS One	18	10	e0292677	4118	10.1371/journal.pone.0292677	{Mu, 2023 #4118}	Yes	Link		Main search	PDF	SH	Exclude	2. Wrong country	China (and not really PH)	PDF	CT	Exclude	2. Wrong country		Exclude	2. Wrong country
Mwase, Patrick, Wolvaardt, Van Wyk, Junger, Wichmann	Public health practice and artificial intelligence: views of future professionals	2023	Journal of Public Health	33	7	1481-1489	4119	10.1007/s10389-023-02127-5	{Mwase, 2023 #4119}	Yes	Link		Main search	PDF	SH	Exclude	2. Wrong country	South Africa	PDF	CT	Exclude	2. Wrong country		Exclude	2. Wrong country
Na, Cho, Geem, Kim	Predicting future onset of depression among community dwelling adults in the Republic of Korea using a machine learning algorithm	2020	Neurosci Lett	721		134804	4120	10.1016/j.neulet.2020.134804	{Na, 2020 #4120}	Yes	Link		Main search	PDF	SH	Exclude	3. Wrong setting	Individual risk prediction	PDF	CT	Exclude	3. Wrong setting		Exclude	3. Wrong setting
Naumova	Who is responsible for AI-generated public health policies?	2023	J Public Health Policy	44	4	517-522	4121	10.1057/s41271-023-00438-1	{Naumova, 2023 #4121}	Yes	Link		Main search	PDF	SH	Exclude	1. No relevant information		PDF	CT	Exclude	1. No relevant information		Exclude	1. No relevant information
Naumova	Artificial intelligence and data analytics competencies for public health professionals	2024	J Public Health Policy	45	3	407-412	4122	10.1057/s41271-024-00499-w	{Naumova, 2024 #4122}	Yes	Link		Main search	PDF	SH	Exclude	1. No relevant information		PDF	CT	Exclude	1. No relevant information		Exclude	1. No relevant information
Naumova	Causal AI for public health research and policy: a journey back to the future	2025	J Public Health Policy	46	1	2025-07-01	4123	10.1057/s41271-024-00541-x	{Naumova, 2025 #4123}	Yes	Link		Main search	PDF	SH	Exclude	1. No relevant information		PDF	CT	Exclude	1. No relevant information		Exclude	1. No relevant information
Nayak, Purohit, Shrivastava, Samuel, Harsh, Singhi	A webinar training on digitally transforming the future of global public health	2021	Indian Journal of Public Health Research and Development	12	4	299 EP - 303	4124	https://medicopublication.com/index.php/ijphrd/article/download/16560/14715/32506	{Nayak, 2021 #4124}	Yes	Link		Main search	PDF	SH	Exclude	1. No relevant information		PDF	CT	Exclude	1. No relevant information		Exclude	1. No relevant information
Ng Yin Ling, Zhu, Ang	Artificial intelligence in myopia in children: current trends and future directions	2024	Curr Opin Ophthalmol	35	6	463-471	4091	10.1097/ICU.0000000000001086	{Ng Yin Ling, 2024 #4091}	Yes	Link		Main search	PDF	SH	Exclude	3. Wrong setting	Healthcare (myopia)	PDF	CT	Exclude	3. Wrong setting		Exclude	3. Wrong setting
Nguyen Hai, Meyer, McGuire, Nguyen Thi Hong, Nguyen Thi	Frontier digital technology: Transforming noncommunicable disease prevention among youth	2022	Lancet Reg Health West Pac	29		100590	4363	https://doi.org/10.1016/j.lanwpc.2022.100590	{Nguyen Hai, 2022 #4363}	Yes	Link		Main search	PDF	SH	Exclude	2. Wrong country	Vietnam	PDF	CT	Exclude	2. Wrong country		Exclude	2. Wrong country
Nguyen, Lee, Rodriguez, Chahal, Freedman, Nazarian	Addressing the growing burden of musculoskeletal diseases in the ageing US population: challenges and innovations	2025	Lancet Healthy Longev	6	5	100707	4362	https://doi.org/10.1016/j.lanhl.2025.100707	{Nguyen, 2025 #4362}	Yes	Link		Main search	PDF	SH	Exclude	3. Wrong setting	Healthcare	PDF	CT	Exclude	3. Wrong setting		Exclude	3. Wrong setting
Nobles, Lall, Mathes, Neill	Presyndromic surveillance for improved detection of emerging public health threats	2022	Sci Adv	8	44	eabm4920	4125	10.1126/sciadv.abm4920	{Nobles, 2022 #4125}	Yes	Link		Main search	PDF	SH	Exclude	3. Wrong setting	Outbreak	PDF	CT	Exclude	3. Wrong setting		Exclude	3. Wrong setting
Noorbakhsh-Sabet, Zand, Zhang, Abedi	Artificial Intelligence Transforms the Future of Health Care	2019	Am J Med	132	7	795-801	4126	10.1016/j.amjmed.2019.01.017	{Noorbakhsh-Sabet, 2019 #4126}	Yes	Link		Main search	PDF	SH	Exclude	3. Wrong setting	Healthcare (general)	PDF	CT	Exclude	3. Wrong setting		Exclude	3. Wrong setting
Ongesa, Ugwu, Ugwu, Alum, Eze, Basajja, Ugwu, Ogenyi, Okon, Ejemot-Nwadiaro	Optimizing emergency response systems in urban health crises: A project management approach to public health preparedness and response	2025	Medicine (Baltimore)	104	3	e41279	4127	10.1097/MD.0000000000041279	{Ongesa, 2025 #4127}	Yes	Link		Main search	PDF	SH	Exclude	1. No relevant information	Almost all non-AI, and the AI-related bit is mostly healthcare	PDF	CT	Exclude	1. No relevant information		Exclude	1. No relevant information
Onyejesi, Alsabri, Del Castillo Miranda, Aziz, Ram, Abady, Abdelbar	Pediatric emergency disaster preparedness: a narrative review of global disparities, challenges, and policy solutions	2025	Int J Emerg Med	18	1	91	4364	https://doi.org/10.1186/s12245-025-00856-w	{Onyejesi, 2025 #4364}	Yes	Link		Main search	PDF	SH	Include			PDF	CT	Include		Consensussed: 06 May	Include
Oon, Oon, Ayaz, Deng, Li, Song	Waterborne pathogens detection technologies: advances, challenges, and future perspectives	2023	Front Microbiol	14		1286923	4128	10.3389/fmicb.2023.1286923	{Oon, 2023 #4128}	Yes	Link		Main search	PDF	SH	Exclude	3. Wrong setting	Water quality	PDF	CT	Exclude	3. Wrong setting		Exclude	3. Wrong setting
Orang, Berke, Poljak, Greer, Rees, Ng	Forecasting seasonal influenza activity in Canada-Comparing seasonal Auto-Regressive integrated moving average and artificial neural network approaches for public health preparedness	2024	Zoonoses Public Health	71	3	304-313	4129	10.1111/zph.13114	{Orang, 2024 #4129}	Yes	Link		Main search	PDF	SH	Exclude	3. Wrong setting	Disease forecasting (outbreak)	PDF	CT	Exclude	3. Wrong setting		Exclude	3. Wrong setting
Özüpak, Alpsalaz, Aslan	Air Quality Forecasting Using Machine Learning: Comparative Analysis and Ensemble Strategies for Enhanced Prediction	2025	Water, Air, & Soil Pollution	236	7		4130	10.1007/s11270-025-08122-8	{Özüpak, 2025 #4130}	Yes	Link		Main search	PDF	SH	Exclude	3. Wrong setting	Air pollution	PDF	CT	Exclude	3. Wrong setting		Exclude	3. Wrong setting
Paepae, Bokoro, Kyamakya	From Fully Physical to Virtual Sensing for Water Quality Assessment: A Comprehensive Review of the Relevant State-of-the-Art	2021	Sensors (Basel)	21	21		4131	10.3390/s21216971	{Paepae, 2021 #4131}	Yes	Link		Main search	PDF	SH	Exclude	3. Wrong setting	Water quality	PDF	CT	Exclude	3. Wrong setting		Exclude	3. Wrong setting
Pandian, Ragavan, Pandian, Kumaraguru, Subramanian	Enhancing Public Health with Pharmacovigilance: Tools, Strategies, and Impacts	2025	Biomedical and Pharmacology Journal	18	2	1147-1154	4132	10.13005/bpj/3158	{Pandian, 2025 #4132}	Yes	Link		Main search	PDF	SH	Exclude	1. No relevant information		PDF	CT	Exclude	1. No relevant information		Exclude	1. No relevant information
Pandya	Towards Smarter Cities: IoT and AI Integration for Effective Air Quality Monitoring and Forecasting						4133	10.1109/ICDCECE65353.2025.11035511	{Pandya, #4133}	Yes	Link		Main search	PDF	SH	Exclude	3. Wrong setting	Air pollution	PDF	CT	Exclude	3. Wrong setting		Exclude	3. Wrong setting
Park, Kim, Pachepsky, Choi, Cho, Jeon, Cho	Development of a Nowcasting System Using Machine Learning Approaches to Predict Fecal Contamination Levels at Recreational Beaches in Korea	2018	J Environ Qual	47	5	1094-1102	4135	10.2134/jeq2017.11.0425	{Park, 2018 #4135}	Yes	Link		Main search	PDF	SH	Exclude	3. Wrong setting	Pollution on beaches	PDF	CT	Exclude	3. Wrong setting		Exclude	3. Wrong setting
Park, Ahn, Ahn, Ahn, Park, Kwon, Ahn, Yang	Artificial Intelligence and Aging in Place: A Scoping Review of Current Applications and Future Directions	2025	Gerontologist	65	6		4134	10.1093/geront/gnaf130	{Park, 2025 #4134}	Yes	Link		Main search	PDF	SH	Include		Aging	PDF	CT	Include			Include
Pawar	Future of Public Health in The Era of Artificial Intelligence	2023	National Journal of Community Medicine	14	2	73-73	4136	10.55489/njcm.140220232876	{Pawar, 2023 #4136}	Yes	Link		Main search	PDF	SH	Exclude	3. Wrong setting	Healthcare, outbreaks	PDF	CT	Exclude	3. Wrong setting		Exclude	3. Wrong setting
Peek, Sujan, Scott	Digital health and care: emerging from pandemic times	2023	BMJ Health Care Inform	30	1		4372	https://doi.org/10.1136/bmjhci-2023-100861	{Peek, 2023 #4372}	Yes	Link		Main search	PDF	SH	Exclude	3. Wrong setting	Healthcare	PDF	CT	Exclude	3. Wrong setting		Exclude	3. Wrong setting
Pencina, McCall, Economou-Zavlanos	A Federated Registration System for Artificial Intelligence in Health	2024	JAMA	332	10	789-790	4373	https://doi.org/10.1001/jama.2024.14026	{Pencina, 2024 #4373}	Yes	Link		Main search	PDF	SH	Exclude	1. No relevant information		PDF	CT	Exclude	1. No relevant information		Exclude	1. No relevant information
Peng, Zhi, Ji, Ji, Tian	Prediction Skill of Extended Range 2-m Maximum Air Temperature Probabilistic Forecasts Using Machine Learning Post-Processing Methods	2020	Atmosphere	11	8		4137	10.3390/atmos11080823	{Peng, 2020 #4137}	Yes	Link		Main search	PDF	SH	Exclude	3. Wrong setting	Air temperature	PDF	CT	Exclude	3. Wrong setting		Exclude	3. Wrong setting
Pickering	Trust, but Verify: Informed Consent, AI Technologies, and Public Health Emergencies	2021	Future Internet	13	5		4138	10.3390/fi13050132	{Pickering, 2021 #4138}	Yes	Link		Main search	PDF	SH	Exclude	1. No relevant information		PDF	CT	Exclude	1. No relevant information		Exclude	1. No relevant information
Picornell, Hurtado, Antequera-Gomez, Barba-Gonzalez, Ruiz-Mata, de Galvez-Montanez, Recio, Trigo, Aldana-Montes, Navas-Delgado	A deep learning LSTM-based approach for forecasting annual pollen curves: Olea and Urticaceae pollen types as a case study	2024	Comput Biol Med	168		107706	4139	10.1016/j.compbiomed.2023.107706	{Picornell, 2024 #4139}	Yes	Link		Main search	PDF	SH	Exclude	3. Wrong setting	Pollen	PDF	CT	Exclude	3. Wrong setting		Exclude	3. Wrong setting
Pierson, Tsai	Misaligned AI constitutes a growing public health threat	2023	BMJ	381		1340	4140	10.1136/bmj.p1340	{Pierson, 2023 #4140}	Yes	Link		Main search	PDF	SH	Exclude	1. No relevant information		PDF	CT	Exclude	1. No relevant information		Exclude	1. No relevant information
Polling, Li, Cao, Verbeek, de Weger, Belmonte, De Linares, Willemse, de Boer, Gravendeel	Neural networks for increased accuracy of allergenic pollen monitoring	2021	Sci Rep	11	1	11357	4141	10.1038/s41598-021-90433-x	{Polling, 2021 #4141}	Yes	Link		Main search	PDF	SH	Exclude	3. Wrong setting	Pollen	PDF	CT	Exclude	3. Wrong setting		Exclude	3. Wrong setting
Raza, Venkatesh, Kvedar	Intelligent risk prediction in public health using wearable device data	2022	NPJ Digit Med	5	1	153	4142	10.1038/s41746-022-00701-x	{Raza, 2022 #4142}	Yes	Link		Main search	PDF	SH	Exclude	3. Wrong setting	Healthcare (diagnosis)	PDF	CT	Exclude	3. Wrong setting		Exclude	3. Wrong setting
Ren, Yan, Zhao, Ma, Zabalza, Hussain, Luo, Dai, Zhao, Sheikh, Hussain, Li	A Novel Intelligent Computational Approach to Model Epidemiological Trends and Assess the Impact of Non-Pharmacological Interventions for COVID-19	2020	IEEE J Biomed Health Inform	24	12	3551-3563	4143	10.1109/JBHI.2020.3027987	{Ren, 2020 #4143}	Yes	Link		Main search	PDF	SH	Exclude	3. Wrong setting	Disease forecasting (outbreak)	PDF	CT	Exclude	3. Wrong setting		Exclude	3. Wrong setting
Resch, Kolokoussis, Hanny, Brovelli, Kamel Boulos	The generative revolution: AI foundation models in geospatial health-applications, challenges and future research	2025	Int J Health Geogr	24	1	6	4144	10.1186/s12942-025-00391-0	{Resch, 2025 #4144}	Yes	Link		Main search	PDF	SH	Include		General PH (geospatial)	PDF	CT	Include			Include
Rezaie, Panahi, Lee, Lee, Kim, Yoo, Lee	Radon potential mapping in Jangsu-gun, South Korea using probabilistic and deep learning algorithms	2022	Environ Pollut	292	Pt B	118385	4145	10.1016/j.envpol.2021.118385	{Rezaie, 2022 #4145}	Yes	Link		Main search	PDF	SH	Exclude	3. Wrong setting	Air quality	PDF	CT	Exclude	3. Wrong setting		Exclude	3. Wrong setting
Rilkoff, Struck, Ziegler, Faye, Paquette, Buckeridge	Innovations in public health surveillance: An overview of novel use of data and analytic methods	2024	Can Commun Dis Rep	50	2025-04-03	93-101	4146	10.14745/ccdr.v50i34a02	{Rilkoff, 2024 #4146}	Yes	Link		Main search	PDF	SH	Exclude	1. No relevant information		PDF	CT	Exclude	1. No relevant information		Exclude	1. No relevant information
Rizwan Abid, Ur Rahman, Khalid	Emerging Trends and Applications of Cyber Security and Artificial Intelligence Tools in Detecting Food Frauds	2025	Food Reviews International	41	8	2388-2405	3955	10.1080/87559129.2025.2493738	{Rizwan Abid, 2025 #3955}	Yes	Link		Main search	PDF	SH	Exclude	3. Wrong setting	Food safety	PDF	CT	Exclude	3. Wrong setting		Exclude	3. Wrong setting
Rodrigues, Madeiro, Marques	Enhancing Health and Public Health through Machine Learning: Decision Support for Smarter Choices	2023	Bioengineering (Basel)	10	7		4147	10.3390/bioengineering10070792	{Rodrigues, 2023 #4147}	Yes	Link		Main search	PDF	SH	Exclude	3. Wrong setting	Healthcare or diagnosis	PDF	CT	Exclude	3. Wrong setting		Exclude	3. Wrong setting
Rubeis, Sixsmith	Editorial: Topical Collection "Ethical and Societal Implications of AgeTech"	2024	Sci Eng Ethics	30	6	61	4379	https://doi.org/10.1007/s11948-024-00521-0	{Rubeis, 2024 #4379}	Yes	Link		Main search	PDF	SH	Exclude	3. Wrong setting	Consensussed: 06 May	PDF	CT	Exclude	3. Wrong setting	These aging ones are really tricky! But again, AI use here feels very focussed on independent living which would be in the social care remit more than PH	Exclude	3. Wrong setting
Rugji, Erol, Tasci, Musa, Hamadani, Gundemir, Karalliu, Siddiqui	Utilization of AI - reshaping the future of food safety, agriculture and food security - a critical review	2025	Crit Rev Food Sci Nutr	65	26	5136-5180	4148	10.1080/10408398.2024.2430749	{Rugji, 2025 #4148}	Yes	Link		Main search	PDF	SH	Exclude	1. No relevant information	Food safety	PDF	CT	Exclude	3. Wrong setting		Exclude	1. No relevant information
Sadri, Fraser	The role of innovative technologies in reducing health system inequity	2024	Healthc Manage Forum	37	2	101-107	4381	https://doi.org/10.1177/08404704231207509	{Sadri, 2024 #4381}	Yes	Link		Main search	PDF	SH	Exclude	3. Wrong setting	Healthcare	PDF	CT	Exclude	3. Wrong setting		Exclude	3. Wrong setting
Sagar, Kolluru, Jaiswal, Kumavat, Hole, Kumar	Machine Learning and Artificial Intelligence for Predictive Modeling in Antimicrobial Resistance Data Sets, Challenges, and Future Directions						4149	10.1109/ICSSES64899.2025.11009316	{Sagar, #4149}	Yes	Link		Main search	PDF	SH	Exclude	3. Wrong setting	AMR	PDF	CT	Exclude	3. Wrong setting		Exclude	3. Wrong setting
Saleem, Al-Ghamdi, Alassafi, AlGhamdi	Machine Learning, Deep Learning, and Mathematical Models to Analyze Forecasting and Epidemiology of COVID-19: A Systematic Literature Review	2022	Int J Environ Res Public Health	19	9		4150	10.3390/ijerph19095099	{Saleem, 2022 #4150}	Yes	Link		Main search	PDF	SH	Exclude	3. Wrong setting	Outbreak (COVID-19)	PDF	CT	Exclude	3. Wrong setting		Exclude	3. Wrong setting
Sallam, Salim, Barakat, Al-Tammemi	ChatGPT applications in medical, dental, pharmacy, and public health education: A descriptive study highlighting the advantages and limitations	2023	Narra J	3	1	e103	4151	10.52225/narra.v3i1.103	{Sallam, 2023 #4151}	Yes	Link		Main search	PDF	SH	Exclude	4. Wrong study type	Asking ChatGPT what it can do for PH education	PDF	CT	Exclude	4. Wrong study type		Exclude	4. Wrong study type
Samal, Babu, Das	Multi-directional temporal convolutional artificial neural network for PM2.5 forecasting with missing values: A deep learning approach	2021	Urban Climate	36			4152	10.1016/j.uclim.2021.100800	{Samal, 2021 #4152}	Yes	Link		Main search	PDF	SH	Exclude	3. Wrong setting	Air pollution	PDF	CT	Exclude	3. Wrong setting		Exclude	3. Wrong setting
Sanci	The Integration of Innovative Technologies to Support Improving Adolescent and Young Adult Health	2020	J Adolesc Health	67	2S	S1-S2	4385	https://doi.org/10.1016/j.jadohealth.2020.05.017	{Sanci, 2020 #4385}	Yes	Link		Main search	PDF	SH	Exclude	3. Wrong setting	Healthcare	PDF	CT	Exclude	3. Wrong setting		Exclude	3. Wrong setting
Scharlach, Wonsikiewicz	Digitale Zukunft im ÖGD: Das NLGA stärkt die Kommunikation mit Bürger*innen durch einen KI-basierten Chatbot und Daten-Dashboards	2025	Das Gesundheitswesen	87	S 01	S100-S100	4153	10.1055/s-0045-1802095	{Scharlach, 2025 #4153}	Yes	Link		Main search	PDF	SH	Exclude	4. Wrong study type	Conference abstract	PDF	CT	Exclude	4. Wrong study type		Exclude	4. Wrong study type
Shaffer, Alenichev, Faure	The Gates Foundation's new AI initiative: attempting to leapfrog global health inequalities?	2023	BMJ Glob Health	8	11		4154	10.1136/bmjgh-2023-013874	{Shaffer, 2023 #4154}	Yes	Link		Main search	PDF	SH	Exclude	4. Wrong study type	Just risks: not potential uses	PDF	CT	Exclude	1. No relevant information		Exclude	4. Wrong study type
Shams, Choi, Singh, Ghahremanloo, Momeni, Park	Innovative approaches for accurate ozone prediction and health risk analysis in South Korea: The combined effectiveness of deep learning and AirQ	2024	Sci Total Environ	946		174158	4156	10.1016/j.scitotenv.2024.174158	{Shams, 2024 #4156}	Yes	Link		Main search	PDF	SH	Exclude	3. Wrong setting	Air quality	PDF	CT	Exclude	3. Wrong setting		Exclude	3. Wrong setting
Shams, Jokar, Jahanbin, Rahmanian	Public concerns about human metapneumovirus: insights from Google search trends, X social networks, and web news mining to enhance public health communication	2025	BMC Public Health	25	1	2650	4155	10.1186/s12889-025-24017-z	{Shams, 2025 #4155}	Yes	Link		Main search	PDF	SH	Include		Communication	PDF	CT	Include		Considered excluding since this is in relation to outbreak management. But probably ok...	Include
Sharma, Deo, Prasad, Parisi	A hybrid air quality early-warning framework: An hourly forecasting model with online sequential extreme learning machines and empirical mode decomposition algorithms	2020	Sci Total Environ	709		135934	4158	10.1016/j.scitotenv.2019.135934	{Sharma, 2020 #4158}	Yes	Link		Main search	PDF	SH	Exclude	3. Wrong setting	Air quality	PDF	CT	Exclude	3. Wrong setting		Exclude	3. Wrong setting
Sharma, Deo, Soar, Prasad, Parisi, Raj	Novel hybrid deep learning model for satellite based PM10 forecasting in the most polluted Australian hotspots	2022	Atmospheric Environment	279			4159	10.1016/j.atmosenv.2022.119111	{Sharma, 2022 #4159}	Yes	Link		Main search	PDF	SH	Exclude	3. Wrong setting	Air quality	PDF	CT	Exclude	3. Wrong setting		Exclude	3. Wrong setting
Sharma	Innovative uses of social media in public health and future applications	2023	Effective Use of Social Media in Public Health			341-349	4391	https://doi.org/10.1016/b978-0-323-95630-7.00011-1	{Sharma, 2023 #4391}	Yes	Link		Main search	PDF	SH	Exclude	4. Wrong study type	Book	PDF	CT	Exclude	4. Wrong study type		Exclude	4. Wrong study type
Shausan, Nazarathy, Dyda	Emerging data inputs for infectious diseases surveillance and decision making	2023	Front Digit Health	5		1131731	4160	10.3389/fdgth.2023.1131731	{Shausan, 2023 #4160}	Yes	Link		Main search	PDF	SH	Exclude	3. Wrong setting	Outbreaks	PDF	CT	Exclude	3. Wrong setting		Exclude	3. Wrong setting
Sheath, Castañeda, Bempong, Raviglione, Machalaba, Pepper, Vayena, Ray, Wernli, Escher, Grey, Elger, Helbing, Kleineberg, Beran, Miranda, Huffman, Hersch, Andayi, Thumbi, D’Acremont, Hartley, Zinsstag, Larus, Rodríguez Martínez, Guerin, Merson, Ngyuen, Rühli, Geissbuhler, Salathé, Bolon, Boehme, Berkley, Valleron, Keiser, Kaiser, Eckerle, Utzinger, Flahault	Precision global health: a roadmap for augmented action	2020	Journal of Public Health and Emergency	4		2026-05-05	4393	https://doi.org/10.21037/jphe.2020.01.01	{Sheath, 2020 #4393}	Yes	Link		Main search	PDF	SH	Exclude	3. Wrong setting	Healthcare	PDF	CT	Exclude	3. Wrong setting		Exclude	3. Wrong setting
Shi, Peng, Lin, Ma, Qi	Perception Research of Artificial Intelligence in Environmental Public Health Physiotherapy Nursing for the Elderly	2022	J Environ Public Health	2022		2124710	4161	10.1155/2022/2124710	{Shi, 2022 #4161}	Yes	Link		Main search	PDF	SH	Exclude	6. Retracted		PDF	CT	Exclude	6. Retracted		Exclude	6. Retracted
Siegel, Levin, Kranzler, Gibson	Do Longitudinal Trends in Tobacco 21-Related Media Coverage Correlate with Policy Support? an Exploratory Analysis Using Supervised and Unsupervised Machine Learning Methods	2022	Health Commun	37	1	29-38	4162	10.1080/10410236.2020.1816282	{Siegel, 2022 #4162}	Yes	Link		Main search	PDF	SH	Exclude	1. No relevant information		PDF	CT	Exclude	1. No relevant information		Exclude	1. No relevant information
Simmons, Bruce, Thomas, Lacey, Marsh, Rosenberg, Duval	Exploring potential of AI usage in the knowledge and evidence services of a public health body: a working group approach	2024	medRxiv				4163	10.1101/2024.07.08.24310046	{Simmons, 2024 #4163}	Yes	Link		Main search	PDF	SH	Exclude	0. Duplicate	Preprint of #4218	PDF	CT	Exclude	0. Duplicate		Exclude	0. Duplicate
Simmons, Bruce, Thomas, Lacey, Marsh, Rosenberg, Duval	Exploring the potential of artificial intelligence usage in the knowledge and evidence services of a public health body: A working group approach	2025	IFLA Journal	51	3	750-765	4218	10.1177/03400352251342513	{Simmons, 2025 #4218}	Yes	Link		Full text from preprint	PDF	SH	Include			PDF	CT	Include			Include
Simpson, Adams, Brugman, Conners	Detecting Novel and Emerging Drug Terms Using Natural Language Processing: A Social Media Corpus Study	2018	JMIR Public Health Surveill	4	1	e2	4164	10.2196/publichealth.7726	{Simpson, 2018 #4164}	Yes	Link		Main search	PDF	SH	Exclude	1. No relevant information		PDF	CT	Exclude	1. No relevant information		Exclude	1. No relevant information
Sivaraman, Proescholdbell, Ezzell, Shanahan	Characterizing Opioid Overdoses Using Emergency Medical Services Data : A Case Definition Algorithm Enhanced by Machine Learning	2021	Public Health Rep	136	1_suppl	62S-71S	4397	https://doi.org/10.1177/00333549211026802	{Sivaraman, 2021 #4397}	Yes	Link		Main search	PDF	SH	Exclude	3. Wrong setting	Healthcare	PDF	CT	Exclude	3. Wrong setting		Exclude	3. Wrong setting
Soroushianfar, Asgari, Afzali, Falahat, Mansoor Baghahi, Haratizadeh, Khalili-Tanha, Nazari	Application of Bioinformatics and Machine Learning Tools in Food Safety	2025	Curr Nutr Rep	14	1	67	4165	10.1007/s13668-025-00657-w	{Soroushianfar, 2025 #4165}	Yes	Link		Main search	PDF	SH	Exclude	3. Wrong setting	Food safety	PDF	CT	Exclude	3. Wrong setting		Exclude	3. Wrong setting
Soyster, Ashlock, Fisher	Pooled and person-specific machine learning models for predicting future alcohol consumption, craving, and wanting to drink: A demonstration of parallel utility	2022	Psychol Addict Behav	36	3	296-306	4166	10.1037/adb0000666	{Soyster, 2022 #4166}	Yes	Link		Main search	PDF	SH	Include		Non-infectious forecasting	PDF	CT	Include			Include
Steindorf, K, Stollenwerk, Cevidanes, Barandika, Vazquez, Garcia-Perez, Aguiar	Forecasting invasive mosquito abundance in the Basque Country, Spain using machine learning techniques	2025	Parasit Vectors	18	1	109	4167	10.1186/s13071-025-06733-y	{Steindorf, 2025 #4167}	Yes	Link		Main search	PDF	SH	Include		Non-infectious forecasting	PDF	CT	Include		Mosquito abundance!	Include
Stevens, Acic, Rhea	Natural Language Processing Insight into LGBTQ+ Youth Mental Health During the COVID-19 Pandemic: Longitudinal Content Analysis of Anxiety-Provoking Topics and Trends in Emotion in LGBTeens Microcommunity Subreddit	2021	JMIR Public Health Surveill	7	8	e29029	4168	10.2196/29029	{Stevens, 2021 #4168}	Yes	Link		Main search	PDF	SH	Exclude	3. Wrong setting	Identifying mental health issues in people on reddit	PDF	CT	Exclude	4. Wrong study type		Exclude	3. Wrong setting
Stickley	The editor is not the author: artificial intelligence and public health publishing	2023	Perspect Public Health	143	4	182-183	4169	10.1177/17579139231191897	{Stickley, 2023 #4169}	Yes	Link		Main search	PDF	SH	Exclude	4. Wrong study type	Editorial asking AI to state how AI could help PH	PDF	CT	Exclude	4. Wrong study type		Exclude	4. Wrong study type
Strahovnik, Miklavčič, Centa	Etični vidiki uporabe algoritemskega odločanja in ostalih sistemov UI v času pandemij oz. izrednih razmer	2020	Bogoslovni vestnik	80	2	321-334	4170	10.34291/BV2020/02/Strahovnik	{Strahovnik, 2020 #4170}	Yes	Link		Main search	PDF	SH	Exclude	3. Wrong setting	Mostly healthcare-related (also in Slovenian)	PDF	CT	Exclude	5. Wrong language		Exclude	3. Wrong setting
Stranieri, Venkatraman, Minicz, Zarnegar, Firmin, Balasubramanian, Jelinek	Emerging point of care devices and artificial intelligence: Prospects and challenges for public health	2022	Smart Health	24		100279	4171	10.1016/j.smhl.2022.100279	{Stranieri, 2022 #4171}	Yes	Link		Main search	PDF	SH	Exclude	3. Wrong setting	Screening	PDF	CT	Exclude	3. Wrong setting		Exclude	3. Wrong setting
Suarjana, Sudirham, Salam, Aditama	Artificial intelligence in public health: the potential and ethical considerations of artificial intelligence in public health	2023	J Public Health (Oxf)	45	4	e834-e835	4172	10.1093/pubmed/fdad116	{Suarjana, 2023 #4172}	Yes	Link		Main search	PDF	SH	Exclude	3. Wrong setting	Healthcare & outbreak	PDF	CT	Exclude	3. Wrong setting		Exclude	3. Wrong setting
Subramaniam, Raju, Ganesan, Rajavel, Chenniappan, Prakash, Pramanik, Basak, Dixit	Artificial Intelligence Technologies for Forecasting Air Pollution and Human Health: A Narrative Review	2022	Sustainability	14	16		4157	10.3390/su14169951	{Subramaniam, 2022 #4157}	Yes	Link		Main search	PDF	SH	Exclude	3. Wrong setting	Air pollution	PDF	CT	Exclude	3. Wrong setting		Exclude	3. Wrong setting
Sufian, Varadarajan, Niu	Enhancing prediction and analysis of UK road traffic accident severity using AI: Integration of machine learning, econometric techniques, and time series forecasting in public health research	2024	Heliyon	10	7	e28547	3956	10.1016/j.heliyon.2024.e28547	{Sufian, 2024 #3956}	Yes	Link		Main search	PDF	SH	Exclude	6. Retracted		PDF	CT	Exclude	6. Retracted		Exclude	6. Retracted
Sung, Hopper	Co-evolution of epidemiology and artificial intelligence: challenges and opportunities	2023	Int J Epidemiol	52	4	969-973	4173	10.1093/ije/dyad089	{Sung, 2023 #4173}	Yes	Link		Main search	PDF	SH	Exclude	3. Wrong setting	Healthcare	PDF	CT	Exclude	3. Wrong setting		Exclude	3. Wrong setting
Tahernejad, Sahebi, Abadi, Safari	Application of artificial intelligence in triage in emergencies and disasters: a systematic review	2024	BMC Public Health	24	1	3203	4174	10.1186/s12889-024-20447-3	{Tahernejad, 2024 #4174}	Yes	Link		Main search	PDF	SH	Include		Emergencies	PDF	CT	Include		Seems very focussed on supporting demand for healthcare in emergencies (can't remember if this is in or out!)	Include
Talias, Lamnisos, Heraclides	Editorial: Data science and health economics in precision public health	2022	Front Public Health	10		960282	4404	https://doi.org/10.3389/fpubh.2022.960282	{Talias, 2022 #4404}	Yes	Link		Main search	PDF	SH	Exclude	1. No relevant information		PDF	CT	Exclude	1. No relevant information		Exclude	1. No relevant information
Tang, Huang, Li, Xu	Artificial intelligence plays an important role in containing public health emergencies	2020	Infect Control Hosp Epidemiol	41	7	869-870	4175	10.1017/ice.2020.103	{Tang, 2020 #4175}	Yes	Link		Main search	PDF	SH	Exclude	2. Wrong country	China (and healthcare/COVID-19)	PDF	CT	Exclude	2. Wrong country		Exclude	2. Wrong country
Thakkar, Slikker, Yiannas, Silva, Blais, Chng, Liu, Adholeya, Pappalardo, Soares, Beeler, Whelan, Roberts, Borlak, Hugas, Torrecilla-Salinas, Girard, Diamond, Verloo, Panda, Rose, Jornet, Furuhama, Fang, Kwegyir-Afful, Heintz, Arvidson, Burgos, Horst, Tong	Artificial intelligence and real-world data for drug and food safety - A regulatory science perspective	2023	Regul Toxicol Pharmacol	140		105388	4177	10.1016/j.yrtph.2023.105388	{Thakkar, 2023 #4177}	Yes	Link		Main search	PDF	SH	Exclude	3. Wrong setting	Food & drug safety	PDF	CT	Exclude	3. Wrong setting		Exclude	3. Wrong setting
Thakkar, Spinardi, Kyaw, Yang, Mendoza, Ozbilgili, Taysi, Dodd, Yarnoff, Oh	Modelling the Potential Public Health Impact of Different COVID-19 Vaccination Strategies with an Adapted Vaccine in Singapore	2024	Expert Rev Vaccines	23	1	16-26	4176	10.1080/14760584.2023.2290931	{Thakkar, 2024 #4176}	Yes	Link		Main search	PDF	SH	Exclude	4. Wrong study type	Not AI	PDF	CT	Exclude	4. Wrong study type		Exclude	4. Wrong study type
Thornton, Carlson, Wiesner	Predicting emerging chemical content in consumer products using machine learning	2022	Sci Total Environ	834		154849	4178	10.1016/j.scitotenv.2022.154849	{Thornton, 2022 #4178}	Yes	Link		Main search	PDF	SH	Exclude	3. Wrong setting	Chemicals in products	PDF	CT	Exclude	3. Wrong setting		Exclude	3. Wrong setting
Thorpe, Chunara, Roberts, Pantaleo, Irvine, Conderino, Li, Hsieh, Gourevitch, Levine, Ofrane, Spoer	Building Public Health Surveillance 3.0: Emerging Timely Measures of Physical, Economic, and Social Environmental Conditions Affecting Health	2022	Am J Public Health	112	10	1436-1445	4179	10.2105/AJPH.2022.306917	{Thorpe, 2022 #4179}	Yes	Link		Main search	PDF	SH	Exclude	1. No relevant information		PDF	CT	Exclude	1. No relevant information		Exclude	1. No relevant information
Topalovic, Tasic, Petrovic, Vlahovic, Radenkovic, Smiciklas	Unveiling the potential of a novel portable air quality platform for assessment of fine and coarse particulate matter: in-field testing, calibration, and machine learning insights	2024	Environ Monit Assess	196	10	888	4180	10.1007/s10661-024-13069-0	{Topalovic, 2024 #4180}	Yes	Link		Main search	PDF	SH	Exclude	3. Wrong setting	Air quality	PDF	CT	Exclude	3. Wrong setting		Exclude	3. Wrong setting
Tsai, Wu, Wu, Yue	Editorial for the special issue on "Transforming public health through artificial intelligence, machine learning and internet of things"	2022	Socioecon Plann Sci	80		101267	4181	10.1016/j.seps.2022.101267	{Tsai, 2022 #4181}	Yes	Link		Main search	PDF	SH	Exclude	1. No relevant information		PDF	CT	Exclude	1. No relevant information		Exclude	1. No relevant information
Tudor, Sova	Mining Google Trends data for nowcasting and forecasting colorectal cancer (CRC) prevalence	2023	PeerJ Comput Sci	9		e1518	4409	https://doi.org/10.7717/peerj-cs.1518	{Tudor, 2023 #4409}	Yes	Link		Main search	PDF	SH	Include			PDF	CT	Include			Include
Uddin, Feng, Xu	Health Communication on the Internet: Promoting Public Health and Exploring Disparities in the Generative AI Era	2025	J Med Internet Res	27		e66032	4182	10.2196/66032	{Uddin, 2025 #4182}	Yes	Link		Main search	PDF	SH	Include		Communication	PDF	CT	Include			Include
Upreti, Singh, Nagpal	Towards a Healthier Future: The Transformative Role of AI in Promoting Good Health and Well-being (SDG-3)		CEUR Workshop Proceedings	3619		57-64	4183		{Upreti, #4183}	Yes			Main search	PDF	SH	Exclude	3. Wrong setting	Healthcare	PDF	CT	Exclude	3. Wrong setting		Exclude	3. Wrong setting
Usmani, Saboor, Haris, Khan, Park	Latest Research Trends in Fall Detection and Prevention Using Machine Learning: A Systematic Review	2021	Sensors (Basel)	21	15		4184	10.3390/s21155134	{Usmani, 2021 #4184}	Yes	Link		Main search	PDF	SH	Exclude	3. Wrong setting	Falls	PDF	CT	Exclude	3. Wrong setting		Exclude	3. Wrong setting
Utunen, Staubitz, George, Zhao, Serth, Tokar	Scale Up Multilingualism in Health Emergency Learning: Developing an Automated Transcription and Translation Tool	2023	Studies in Health Technology and Informatics	302		408-412	4411	https://doi.org/10.3233/SHTI230162	{Utunen, 2023 #4411}	Yes	Link		Main search	PDF	SH	Exclude	1. No relevant information	The tool connects to AI services to provide translations, which feels a step removed from an include (noting that "translations" are already included in this review)	PDF	CT	Exclude	1. No relevant information		Exclude	1. No relevant information
Valput, Navares, Aznarte	Forecasting hourly $${\hbox {NO}_{2}}$$ concentrations by ensembling neural networks and mesoscale models	2019	Neural Computing and Applications	32	13	9331-9342	4185	10.1007/s00521-019-04442-z	{Valput, 2019 #4185}	Yes	Link		Main search	PDF	SH	Exclude	3. Wrong setting	Air pollution	PDF	CT	Exclude	3. Wrong setting		Exclude	3. Wrong setting
Velmovitsky, Bevilacqua, Alencar, Cowan, Morita	Convergence of Precision Medicine and Public Health Into Precision Public Health: Toward a Big Data Perspective	2021	Front Public Health	9		561873	4413	https://doi.org/10.3389/fpubh.2021.561873	{Velmovitsky, 2021 #4413}	Yes	Link		Main search	PDF	SH	Exclude	1. No relevant information	Some risks, but no specific public health uses of AI, beyond vague "use it to analyse big data" - to do what, and how?	PDF	CT	Exclude	1. No relevant information		Exclude	1. No relevant information
Verma, Ranga, Vishwakarma	BREATH-Net: a novel deep learning framework for NO(2) prediction using bi-directional encoder with transformer	2024	Environ Monit Assess	196	4	340	4186	10.1007/s10661-024-12455-y	{Verma, 2024 #4186}	Yes	Link		Main search	PDF	SH	Exclude	3. Wrong setting	Air pollution	PDF	CT	Exclude	3. Wrong setting		Exclude	3. Wrong setting
Villanueva-Miranda, Xie, Xiao	Sentiment analysis in public health: a systematic review of the current state, challenges, and future directions	2025	Front Public Health	13		1609749	4187	10.3389/fpubh.2025.1609749	{Villanueva-Miranda, 2025 #4187}	Yes	Link		Main search	PDF	SH	Include		Sentiment analysis	PDF	CT	Include			Include
Vinodhini, Prabu, Prashanthy, Rajmohan, Bharathwaj, Sindhu, Dhamodhar, Suganya	Growth Trends of Artificial Intelligence in Public Health: A Scientometric Analysis	2022	NeuroQuantology	20	15	316 EP - 324	4415	https://www.neuroquantology.com/open-access/Growth+Trends+of+Artificial+Intelligence+in+Public+Health%253A+A+Scientometric+Analysis_7726/	{Vinodhini, 2022 #4415}	Yes	Link		Main search	PDF	SH	Exclude	4. Wrong study type	Bibliometric	PDF	CT	Exclude	4. Wrong study type		Exclude	4. Wrong study type
Wang, Wu, Li	An Improved Genetic Algorithm for Location Allocation Problem with Grey Theory in Public Health Emergencies	2022	Int J Environ Res Public Health	19	15		4188	10.3390/ijerph19159752	{Wang, 2022 #4188}	Yes	Link		Main search	PDF	SH	Exclude	3. Wrong setting	Outbreak (COVID-19)	PDF	CT	Exclude	3. Wrong setting		Exclude	3. Wrong setting
Webster, Neal	What's artificial intelligence (AI) got to do with it-inequality and public health?	2024	J Public Health (Oxf)	46	2	207-208	4189	10.1093/pubmed/fdae052	{Webster, 2024 #4189}	Yes	Link		Main search	PDF	SH	Exclude	1. No relevant information		PDF	CT	Exclude	1. No relevant information		Exclude	1. No relevant information
Wegener, J, Kramer, Schmidt, Borgnakke	Co-Designing a Conversational Agent With Older Adults With Chronic Obstructive Pulmonary Disease Who Age in Place: Qualitative Study	2024	JMIR Hum Factors	11		e63222	4417	https://doi.org/10.2196/63222	{Wegener, 2024 #4417}	Yes	Link		Main search	PDF	SH	Exclude	3. Wrong setting	Healthcare - possible include, but feels too much like the chatbot would replace clinical care, rather than public health	PDF	CT	Exclude	3. Wrong setting	Had similar thoughts to you, but ultimately agreed that this one is probably closer aligned to clinical management with 'PH extras'	Exclude	3. Wrong setting
Wei, Wang, Li, Kondragunta, Anenberg, Wang, Zhang, Diner, Hand, Lyapustin, Kahn, Colarco, da Silva, Ichoku	Long-term mortality burden trends attributed to black carbon and PM(2.5) from wildfire emissions across the continental USA from 2000 to 2020: a deep learning modelling study	2023	Lancet Planet Health	7	12	e963-e975	4190	10.1016/S2542-5196(23)00235-8	{Wei, 2023 #4190}	Yes	Link		Main search	PDF	SH	Exclude	3. Wrong setting	Air pollution	PDF	CT	Exclude	3. Wrong setting		Exclude	3. Wrong setting
Wei, Gu, Cao, Sun, Wei, Li, Fly, Gu, Yao, Sun	Evaluation of the potential value of artificial intelligence (AI) in public health using fluoride intake as the example	2025	Ecotoxicol Environ Saf	291		117805	4191	10.1016/j.ecoenv.2025.117805	{Wei, 2025 #4191}	Yes	Link		Main search	PDF	SH	Exclude	4. Wrong study type	Asking ChatGPT questions about PH	PDF	CT	Exclude	4. Wrong study type		Exclude	4. Wrong study type
Wesson, Hswen, Valdes, Stojanovski, Handley	Risks and Opportunities to Ensure Equity in the Application of Big Data Research in Public Health	2022	Annu Rev Public Health	43		59-78	4192	10.1146/annurev-publhealth-051920-110928	{Wesson, 2022 #4192}	Yes	Link		Main search	PDF	SH	Exclude	3. Wrong setting	Healthcare	PDF	CT	Exclude	3. Wrong setting		Exclude	3. Wrong setting
Williams, Chaturvedi, Urman, Waterman, Gabriel	Artificial Intelligence and a Pandemic: an Analysis of the Potential Uses and Drawbacks	2021	J Med Syst	45	3	26	4193	10.1007/s10916-021-01705-y	{Williams, 2021 #4193}	Yes	Link		Main search	PDF	SH	Exclude	3. Wrong setting	Outbreaks	PDF	CT	Exclude	3. Wrong setting		Exclude	3. Wrong setting
Wolfenden, Williams, Kingsland, Yoong, Nathan, Sutherland, Wiggers	Improving the impact of public health service delivery and research: a decision tree to aid evidence-based public health practice and research	2020	Aust N Z J Public Health	44	5	331-332	4194	10.1111/1753-6405.13023	{Wolfenden, 2020 #4194}	Yes	Link		Main search	PDF	SH	Exclude	4. Wrong study type	Not AI	PDF	CT	Exclude	4. Wrong study type		Exclude	4. Wrong study type
Wood	Trend-attribute forecasting of hourly PM2.5 trends in fifteen cities of Central England applying optimized machine learning feature selection	2024	J Environ Manage	356		120561	4195	10.1016/j.jenvman.2024.120561	{Wood, 2024 #4195}	Yes	Link		Main search	PDF	SH	Exclude	3. Wrong setting	Air pollution	PDF	CT	Exclude	3. Wrong setting		Exclude	3. Wrong setting
Wu, Lin	Daily urban air quality index forecasting based on variational mode decomposition, sample entropy and LSTM neural network	2019	Sustainable Cities and Society	50			4197	10.1016/j.scs.2019.101657	{Wu, 2019 #4197}	Yes	Link		Main search	PDF	SH	Exclude	3. Wrong setting	Air quality	PDF	CT	Exclude	3. Wrong setting		Exclude	3. Wrong setting
Wu, Hsia, Kow, Chang, Chang	High-spatiotemporal-resolution PM2.5 forecasting by hybrid deep learning models with ensembled massive heterogeneous monitoring data	2023	Journal of Cleaner Production	433			4196	10.1016/j.jclepro.2023.139825	{Wu, 2023 #4196}	Yes	Link		Main search	PDF	SH	Exclude	3. Wrong setting	Air pollution	PDF	CT	Exclude	3. Wrong setting		Exclude	3. Wrong setting
Xia, Sun, Wang, Zhang, Kamal, Jasimuddin, Islam	Emergency medical supplies scheduling during public health emergencies: algorithm design based on AI techniques	2023	International Journal of Production Research	63	2	628-650	4198	10.1080/00207543.2023.2267680	{Xia, 2023 #4198}	Yes	Link		Main search	PDF	SH	Include		Emergencies	PDF	CT	Include			Include
Yang, B, Murphy, Choset, Christensen, S, Dario, Goldberg, Ikuta, Jacobstein, Kragic, Taylor, McNutt	Combating COVID-19-The role of robotics in managing public health and infectious diseases	2020	Sci Robot	5	40		4200	10.1126/scirobotics.abb5589	{Yang, 2020 #4200}	Yes	Link		Main search	PDF	SH	Exclude	4. Wrong study type	Not AI	PDF	CT	Exclude	4. Wrong study type		Exclude	4. Wrong study type
Yang, Chen, Wu, Wu, Yang	Forecasting of the Prevalence of Dementia Using the LSTM Neural Network in Taiwan	2021	Mathematics	9	5		4201	10.3390/math9050488	{Yang, 2021 #4201}	Yes	Link		Main search	PDF	SH	Include		Non-infectious forecasting	PDF	CT	Include			Include
Yang, Tang, Hao, Wang	A Novel Framework for Forecasting, Evaluation and Early-Warning for the Influence of PM10 on Public Health	2021	Atmosphere	12	8		4202	10.3390/atmos12081020	{Yang, 2021 #4202}	Yes	Link		Main search	PDF	SH	Exclude	3. Wrong setting	Air pollution	PDF	CT	Exclude	3. Wrong setting		Exclude	3. Wrong setting
Yang, Chen, Yang, Chuang	Analysis and Forecasting of Air Pollution on Nitrogen Dioxide and Sulfur Dioxide Using Deep Learning	2024	IEEE Access	12		165236-165252	4199	10.1109/access.2024.3494263	{Yang, 2024 #4199}	Yes	Link		Main search	PDF	SH	Exclude	3. Wrong setting	Air pollution	PDF	CT	Exclude	3. Wrong setting		Exclude	3. Wrong setting
Yoga Ratnam	Generative artificial intelligence in public health research and scientific communication: A narrative review of real applications and future directions	2025	Digit Health	11		2.05521e+16	4203	10.1177/20552076251362070	{Yoga Ratnam, 2025 #4203}	Yes	Link		Main search	PDF	SH	Include		Communication	PDF	CT	Include			Include
Yu, Yao, Zhang, Victorio Ramos, Rodriguez-Saona, Wang	Sources, advances, and future prospects of screening food contaminants in plant-based foods by vibrational spectroscopy combined with machine learning	2025	Trends in Food Science & Technology	160			4204	10.1016/j.tifs.2025.105017	{Yu, 2025 #4204}	Yes	Link		Main search	PDF	SH	Exclude	3. Wrong setting	Food safety	PDF	CT	Exclude	3. Wrong setting		Exclude	3. Wrong setting
Zaini, Ean, Ahmed, Malek	A systematic literature review of deep learning neural network for time series air quality forecasting	2022	Environ Sci Pollut Res Int	29	4	4958-4990	4205	10.1007/s11356-021-17442-1	{Zaini, 2022 #4205}	Yes	Link		Main search	PDF	SH	Exclude	3. Wrong setting	Air quality	PDF	CT	Exclude	3. Wrong setting		Exclude	3. Wrong setting
Zeng, Sun, Li	Multimodal negative sentiment recognition of online public opinion on public health emergencies based on graph convolutional networks and ensemble learning	2023	Information Processing & Management	60	4		4206	10.1016/j.ipm.2023.103378	{Zeng, 2023 #4206}	Yes	Link		Main search	PDF	SH	Include		Sentiment analysis	PDF	CT	Include			Include
Zewdie, Lary, Levetin, Garuma	Applying Deep Neural Networks and Ensemble Machine Learning Methods to Forecast Airborne Ambrosia Pollen	2019	Int J Environ Res Public Health	16	11		4207	10.3390/ijerph16111992	{Zewdie, 2019 #4207}	Yes	Link		Main search	PDF	SH	Exclude	3. Wrong setting	Air pollution	PDF	CT	Exclude	3. Wrong setting		Exclude	3. Wrong setting
Zhang	Research on the Application of Computer Artificial Intelligence Technology in the Response Mechanism of Emergency Logistics System	2022				676-680	4210	10.1109/AEECA55500.2022.9918994	{Zhang, 2022 #4210}	Yes	Link		Main search	PDF	SH	Include		Emergencies	PDF	CT	Include			Include
Zhang, Hou, Zhang, Yao, Zhang	Detecting Social Media Rumor Debunking Effectiveness During Public Health Emergencies: An Interpretable Machine Learning Approach	2024	Science Communication	47	1	23-56	4209	10.1177/10755470241261323	{Zhang, 2024 #4209}	Yes	Link		Main search	PDF	SH	Exclude	3. Wrong setting	COVID-19 and China	PDF	CT	Exclude	2. Wrong country		Exclude	3. Wrong setting
Zhang, Zhang, Zhao, Yang, Liang	Multi-frequency spatial-temporal graph neural network for short-term metro OD demand prediction during public health emergencies	2025	Transportation				4208	10.1007/s11116-025-10582-0	{Zhang, 2025 #4208}	Yes	Link		Main search	PDF	SH	Exclude	3. Wrong setting	Transport	PDF	CT	Exclude	3. Wrong setting		Exclude	3. Wrong setting
Zheng, Hu	Early Warning Method for Public Health Emergency Under Artificial Neural Network in the Context of Deep Learning	2021	Front Psychol	12		594031	4212	10.3389/fpsyg.2021.594031	{Zheng, 2021 #4212}	Yes	Link		Main search	PDF	SH	Exclude	3. Wrong setting	Outbreak	PDF	CT	Exclude	3. Wrong setting		Exclude	3. Wrong setting
Zheng, Peng	The impact of public health emergency governance based on artificial intelligence	2022	Journal of Intelligent Systems	31	1	891-901	4211	10.1515/jisys-2022-0065	{Zheng, 2022 #4211}	Yes	Link		Main search	PDF	SH	Exclude	3. Wrong setting	Outbreak	PDF	CT	Exclude	3. Wrong setting		Exclude	3. Wrong setting
Zhong, Xiao, Wang, Yang, Lu, Zheng, Jiang, Rao, Luo, Huang	Identifying influence factors and thresholds of the next day's pollen concentration in different seasons using interpretable machine learning	2024	Sci Total Environ	935		173430	4213	10.1016/j.scitotenv.2024.173430	{Zhong, 2024 #4213}	Yes	Link		Main search	PDF	SH	Exclude	3. Wrong setting	Air pollution	PDF	CT	Exclude	3. Wrong setting		Exclude	3. Wrong setting

## Sheet: Data extraction
Authors	Title	Year	Journal	Volume	Issue	Pages	Endnote ID	DOI	Endnote reference	PDF 1	PDF 2	PH Context	Type of report	Type of AI	Notes			Reviewer	Folder
Abdelouahed, Yateem, Amzil, Aribi, Abdelwahed, Fredericks	Integrating artificial intelligence into public health education and healthcare: insights from the COVID-19 and monkeypox crises for future pandemic readiness	2025	Frontiers in Education	10			3954	10.3389/feduc.2025.1518909	{Abdelouahed, 2025 #3954}	PDF	PDF	Communication	Commentary	Machine Translation models				1
Awan, Gonzalez, Sharma	A Neoteric Approach toward Social Media in Public Health Informatics: A Narrative Review of Current Trends and Future Directions	2024	Information	15	5		3973	10.3390/info15050276	{Awan, 2024 #3973}	PDF	PDF	Communication	Review	Natural language processing				2
Baclic, Tunis, Young, Doan, Swerdfeger, Schonfeld	Challenges and opportunities for public health made possible by advances in natural language processing	2020	Can Commun Dis Rep	46	6	161-168	3976	10.14745/ccdr.v46i06a02	{Baclic, 2020 #3976}	PDF	PDF	Communication	Commentary	Natural language processing
Bharel, Auerbach, Nguyen, DeSalvo	Transforming Public Health Practice With Generative Artificial Intelligence	2024	Health Aff (Millwood)	43	6	776-782	3982	10.1377/hlthaff.2024.00050	{Bharel, 2024 #3982}	PDF	PDF	Communication	Commentary	GenAI
Chassang, Beranger, Rial-Sebbag	The Emergence of AI in Public Health Is Calling for Operational Ethics to Foster Responsible Uses	2025	Int J Environ Res Public Health	22	4		3999	10.3390/ijerph22040568	{Chassang, 2025 #3999}	PDF	PDF	Communication	Review	Not specified
Chun, Yi, Li, Wu	Internet public opinion monitoring in public health emergencies may benefit from artificial intelligence	2021	Medical Data Mining	4	3		4090	10.53388/mdm2021063009	{Chun, 2021 #4090}	PDF	PDF	Communication	Commentary	Not specified
Edinger, Valdez, Walsh-Buhi, Bollen	Deep learning for topical trend discovery in online discourse about Pre-Exposure Prophylaxis (PrEP)	2023	AIDS Behav	27	2	443-453	4027	10.1007/s10461-022-03779-2	{Edinger, 2023 #4027}	PDF	PDF	Communication	Primary study	Natural language processing
Kamitani, Koenig, Sullivan	Transformative potential of artificial intelligence in US CDC HIV interventions: balancing innovation with health privacy	2025	AIDS	39	10	1311-1321	4070	10.1097/QAD.0000000000004220	{Kamitani, 2025 #4070}	PDF	PDF	Communication	Editorial review	Deep learning, genAI
Leal Neto, Von Wyl	Digital Transformation of Public Health for Noncommunicable Diseases: Narrative Viewpoint of Challenges and Opportunities	2024	JMIR Public Health Surveill	10		e49575	4081	10.2196/49575	{Leal Neto, 2024 #4081}	PDF	PDF	Communication	Commentary	GenAI
Losch, Zuiderent-Jerak, Kunneman, Syurina, Bongers, Stein, Chan, Willems, Timen	Capturing Emerging Experiential Knowledge for Vaccination Guidelines Through Natural Language Processing: Proof-of-Concept Study	2023	J Med Internet Res	25		e44461	4096	10.2196/44461	{Losch, 2023 #4096}	PDF	PDF	Communication	Primary study	Machine learning, natural language processing
Marcus, Sewell, Balzer, Krakower	Artificial Intelligence and Machine Learning for HIV Prevention: Emerging Approaches to Ending the Epidemic	2020	Curr HIV/AIDS Rep	17	3	171-179	4108	10.1007/s11904-020-00490-6	{Marcus, 2020 #4108}	PDF	PDF	Communication	Commentary	Chatbots
Marra, Langford, Nori, Bearman	Revolutionizing antimicrobial stewardship, infection prevention, and public health with artificial intelligence: the middle path	2023	Antimicrob Steward Healthc Epidemiol	3	1	e219	4109	10.1017/ash.2023.494	{Marra, 2023 #4109}	PDF	PDF	Communication	Commentary	GenAI
Miller, Sehat, Jennings	Leveraging AI for Public Health Communication: Opportunities and Risks	2024	J Public Health Manag Pract	30	4	616-618	4116	10.1097/PHH.0000000000001986	{Miller, 2024 #4116}	PDF	PDF	Communication	Commentary	AI, chatbots
Shams, Jokar, Jahanbin, Rahmanian	Public concerns about human metapneumovirus: insights from Google search trends, X social networks, and web news mining to enhance public health communication	2025	BMC Public Health	25	1	2650	4155	10.1186/s12889-025-24017-z	{Shams, 2025 #4155}	PDF	PDF	Communication	Primary study	Deep learning
Uddin, Feng, Xu	Health Communication on the Internet: Promoting Public Health and Exploring Disparities in the Generative AI Era	2025	J Med Internet Res	27		e66032	4182	10.2196/66032	{Uddin, 2025 #4182}	PDF	PDF	Communication	Commentary	GenAI
Villanueva-Miranda, Xie, Xiao	Sentiment analysis in public health: a systematic review of the current state, challenges, and future directions	2025	Front Public Health	13		1609749	4187	10.3389/fpubh.2025.1609749	{Villanueva-Miranda, 2025 #4187}	PDF	PDF	Communication	Review	Machine learning, deep learning, natural language processing, large language models
Yoga Ratnam	Generative artificial intelligence in public health research and scientific communication: A narrative review of real applications and future directions	2025	Digit Health	11		2.05521e+16	4203	10.1177/20552076251362070	{Yoga Ratnam, 2025 #4203}	PDF	PDF	Communication	Review	GenAI
Zeng, Sun, Li	Multimodal negative sentiment recognition of online public opinion on public health emergencies based on graph convolutional networks and ensemble learning	2023	Information Processing & Management	60	4		4206	10.1016/j.ipm.2023.103378	{Zeng, 2023 #4206}	PDF	PDF	Communication	Primary study	Natural language processing
Abdelouahed, Yateem, Amzil, Aribi, Abdelwahed, Fredericks	Integrating artificial intelligence into public health education and healthcare: insights from the COVID-19 and monkeypox crises for future pandemic readiness	2025	Frontiers in Education	10			3954	10.3389/feduc.2025.1518909	{Abdelouahed, 2025 #3954}	PDF	PDF	Education	Commentary	Not specified, machine learning
Chassang, Beranger, Rial-Sebbag	The Emergence of AI in Public Health Is Calling for Operational Ethics to Foster Responsible Uses	2025	Int J Environ Res Public Health	22	4		3999	10.3390/ijerph22040568	{Chassang, 2025 #3999}	PDF	PDF	Education	Review	Not specified
Love, Niu, Labay-Marquez	Artificial Intelligence in Public Health Education: Navigating Ethical Challenges and Empowering the Next Generation of Professionals	2025	Health Promot Pract			1.52484e+16	4097	10.1177/15248399251320989	{Love, 2025 #4097}	PDF	PDF	Education	Commentary	Not specified
Ali Maher, Cegolon, Bellizzi	Artificial intelligence as a tool for enhancing the performance of public health emergency operation centres (EOC)	2025	BMJ Glob Health	10	3		4105	10.1136/bmjgh-2024-016097	{Ali Maher, 2025 #4105}	PDF	PDF	Emergencies	Commentary	Not specified
Ali Maher, Panu Napodano, Bellizzi	Potential of artificial intelligence in public health disaster and emergency management	2024	Public Health	231		e1-e2	4106	10.1016/j.puhe.2024.03.017	{Ali Maher, 2024 #4106}	PDF	PDF	Emergencies	Commentary	Machine learning
Azzolina, Bressan, Lorenzoni, Baldan, Bartolotta, Scognamiglio, Francavilla, Lanera, Da Dalt, Gregori	Pediatric Injury Surveillance From Uncoded Emergency Department Admission Records in Italy: Machine Learning-Based Text-Mining Approach	2023	JMIR Public Health Surveill	9		e44467	4241	https://doi.org/10.2196/44467	{Azzolina, 2023 #4241}	PDF	PDF	Emergencies	Review	Machine learning, natural language processing
Chun, Yi, Li, Wu	Internet public opinion monitoring in public health emergencies may benefit from artificial intelligence	2021	Medical Data Mining	4	3		4090	10.53388/mdm2021063009	{Chun, 2021 #4090}	PDF	PDF	Emergencies	Commentary	Not specified
Fant, Adelman	Building Community Resilience in Support of Public Health Emergency Preparedness with Big Data and AI	2022	Comput Inform Nurs	40	12	836-840	4032	10.1097/CIN.0000000000000869	{Fant, 2022 #4032}	PDF	PDF	Emergencies	Commentary	Not specified
Lu, Christie, Nguyen, Freeman, Hsu	Applications of Artificial Intelligence and Machine Learning in Disasters and Public Health Emergencies	2022	Disaster Med Public Health Prep	16	4	1674-1681	4099	10.1017/dmp.2021.125	{Lu, 2022 #4099}	PDF	PDF	Emergencies	Review	Machine learning
McDaniel, Akwafuo, Urbanovsky, Mikler	Benchmarking a fast, satisficing vehicle routing algorithm for public health emergency planning and response: "Good Enough for Jazz"	2023	PeerJ Comput Sci	9		e1541	4113	10.7717/peerj-cs.1541	{McDaniel, 2023 #4113}	PDF	PDF	Emergencies	Primary study	Receiving-staging-storing-distributing (RSSD) algorithm
Tahernejad, Sahebi, Abadi, Safari	Application of artificial intelligence in triage in emergencies and disasters: a systematic review	2024	BMC Public Health	24	1	3203	4174	10.1186/s12889-024-20447-3	{Tahernejad, 2024 #4174}	PDF	PDF	Emergencies	Review	AI-assisted devices and machine learning
Xia, Sun, Wang, Zhang, Kamal, Jasimuddin, Islam	Emergency medical supplies scheduling during public health emergencies: algorithm design based on AI techniques	2023	International Journal of Production Research	63	2	628-650	4198	10.1080/00207543.2023.2267680	{Xia, 2023 #4198}	PDF	PDF	Emergencies	Review and primary study	Ant colony algorithm
Zhang	Research on the Application of Computer Artificial Intelligence Technology in the Response Mechanism of Emergency Logistics System	2022				676-680	4210	10.1109/AEECA55500.2022.9918994	{Zhang, 2022 #4210}	PDF	PDF	Emergencies	Commentary	Not specified
Baclic, Tunis, Young, Doan, Swerdfeger, Schonfeld	Challenges and opportunities for public health made possible by advances in natural language processing	2020	Can Commun Dis Rep	46	6	161-168	3976	10.14745/ccdr.v46i06a02	{Baclic, 2020 #3976}	PDF	PDF	Evidence reviews	Commentary	Natural language processing
Chai, Lines, Gucciardi, Ng	Research Screener: a machine learning tool to semi-automate abstract screening for systematic reviews	2021	Syst Rev	10	1	93	3995	10.1186/s13643-021-01635-3	{Chai, 2021 #3995}	PDF	PDF	Evidence reviews	Primary study	Deep learning, natural language processing
Dobolyi, Hussain, McPeak	Predicting the Utility of Scientific Articles for Emerging Pandemics Using Their Titles and Natural Language Processing	2024	Disaster Med Public Health Prep	18		e103	4022	10.1017/dmp.2024.109	{Dobolyi, 2024 #4022}	PDF	PDF	Evidence reviews	Primary study	Natural language processing
Hamel, Hersi, Kelly, Tricco, Straus, Wells, Pham, Hutton	Guidance for using artificial intelligence for title and abstract screening while conducting knowledge syntheses	2021	BMC Med Res Methodol	21	1	285	4047	10.1186/s12874-021-01451-2	{Hamel, 2021 #4047}	PDF	PDF	Evidence reviews	Guidance	Machine learning
Hyun Lim, Hersi, Krishnan, Montroy, Rook, Farrah, Chung, Stevens, Zafack, Wong, Forbes, Killikelly, Young, Tunis	COVID-19 vaccine evidence monitoring assisted by artificial Intelligence: An emergency system implemented by the Public Health Agency of Canada to capture and describe the trajectory of evolving pandemic vaccine literature	2024	Vaccine X	21		100575	4063	10.1016/j.jvacx.2024.100575	{Hyun Lim, 2024 #4063}	PDF	PDF	Evidence reviews	Primary study	Natural language processing
Jardim, Rose, Ames, Echavez, Van de Velde, Muller	Automating risk of bias assessment in systematic reviews: a real-time mixed methods comparison of human researchers to a machine learning system	2022	BMC Med Res Methodol	22	1	167	4066	10.1186/s12874-022-01649-y	{Jardim, 2022 #4066}	PDF	PDF	Evidence reviews	Primary study	Natural language processing
Luo, Chen, Zhu, Wang, Wang, Liu, Lyu, Wang, Wang, Chen	Potential Roles of Large Language Models in the Production of Systematic Reviews and Meta-Analyses	2024	J Med Internet Res	26		e56780	4101	10.2196/56780	{Luo, 2024 #4101}	PDF	PDF	Evidence reviews	Commentary	Large language models
Simmons, Bruce, Thomas, Lacey, Marsh, Rosenberg, Duval	Exploring the potential of artificial intelligence usage in the knowledge and evidence services of a public health body: A working group approach	2025	IFLA Journal	51	3	750-765	4218	10.1177/03400352251342513	{Simmons, 2025 #4218}	PDF	PDF	Evidence reviews	Primary study	Machine learning, large language models
Ali, Jahagirdar, Blaney, Dahiya, Gangwani, Patel, Hayat, Jaber, Simonetto, Satapathy	Forecasting Alcohol-Related Liver Disease Mortality Trends in Younger Populations Using Advanced Time-Series Models: A 1999-2030 Analysis	2024	JGH Open	8	12	e70057	3960	10.1002/jgh3.70057	{Ali, 2024 #3960}	PDF	PDF	Forecasting	Primary study	Machine learning (ARIMA)
Ali, Rasheed, Moond, Dahiya, Swaiti, Gangwani, Hayat, Advani	Obesity Related Mortality in the Next Generation: Projections Based on Machine Learning for Young Americans (1999–2035)	2025	Obesity Science & Practice	11	2	e70062	3961	10.1002/osp4.70062	{Ali, 2025 #3961}	PDF	PDF	Forecasting	Primary study	Machine learning (ARIMA)
Ayub, Khan, Shehryar Ali Naqvi, Faseeh, Kim, Mehmood, Kim	Unraveling the Potential of Attentive Bi-LSTM for Accurate Obesity Prognosis: Advancing Public Health towards Sustainable Cities	2024	Bioengineering (Basel)	11	6		3975	10.3390/bioengineering11060533	{Ayub, 2024 #3975}	PDF	PDF	Forecasting	Primary study	Deep learning
Çolak	Future projections of elderly obesity in the United States using time series models	2025	Obesity Medicine	56		100627	4008	10.1016/j.obmed.2025.100627	{Çolak, 2025 #4008}	PDF	PDF	Forecasting	Primary study	Machine learning
Dritsakis, Gallos, Psomiadi, Amditis, Dionysiou	Data Analytics to Support Policy Making for Noncommunicable Diseases: Scoping Review	2024	Online J Public Health Inform	16		e59906	4276	https://doi.org/10.2196/59906	{Dritsakis, 2024 #4276}	PDF	PDF	Forecasting	Review	Machine learning
Esmaeilyfard, Bayati	Enhancing AI-driven forecasting of diabetes burden: a comparative analysis of deep learning and statistical models	2025	Sci Rep	15	1	29137	4029	10.1038/s41598-025-14599-4	{Esmaeilyfard, 2025 #4029}	PDF	PDF	Forecasting	Primary study	Deep learning
Feretzakis, Theodorakis, Vamvakou, Hitas, Anagnostou, Kalantzi, Spyridaki, Kollia, Christodoulou, Kalles, Gkontzis, Verykios, Nikolaou	Advancing Cardiovascular Mortality Trend Analysis: A Machine Learning Approach to Predict Future Health Policy Needs	2024	Stud Health Technol Inform	316		868-872	4033	10.3233/SHTI240549	{Feretzakis, 2024 #4033}	PDF	PDF	Forecasting	Primary study	Machine learning
Resch, Kolokoussis, Hanny, Brovelli, Kamel Boulos	The generative revolution: AI foundation models in geospatial health-applications, challenges and future research	2025	Int J Health Geogr	24	1	6	4144	10.1186/s12942-025-00391-0	{Resch, 2025 #4144}	PDF	PDF	Forecasting	Commentary	Large language models
Soyster, Ashlock, Fisher	Pooled and person-specific machine learning models for predicting future alcohol consumption, craving, and wanting to drink: A demonstration of parallel utility	2022	Psychol Addict Behav	36	3	296-306	4166	10.1037/adb0000666	{Soyster, 2022 #4166}	PDF	PDF	Forecasting	Primary study	Machine learning
Steindorf, K, Stollenwerk, Cevidanes, Barandika, Vazquez, Garcia-Perez, Aguiar	Forecasting invasive mosquito abundance in the Basque Country, Spain using machine learning techniques	2025	Parasit Vectors	18	1	109	4167	10.1186/s13071-025-06733-y	{Steindorf, 2025 #4167}	PDF	PDF	Forecasting	Primary study	Machine learning
Tudor, Sova	Mining Google Trends data for nowcasting and forecasting colorectal cancer (CRC) prevalence	2023	PeerJ Comput Sci	9		e1518	4409	https://doi.org/10.7717/peerj-cs.1518	{Tudor, 2023 #4409}	PDF	PDF	Forecasting	Primary study	Machine learning (ARIMA, ANN)
Yang, Chen, Wu, Wu, Yang	Forecasting of the Prevalence of Dementia Using the LSTM Neural Network in Taiwan	2021	Mathematics	9	5		4201	10.3390/math9050488	{Yang, 2021 #4201}	PDF	PDF	Forecasting	Primary study	Machine learning
Abdelouahed, Yateem, Amzil, Aribi, Abdelwahed, Fredericks	Integrating artificial intelligence into public health education and healthcare: insights from the COVID-19 and monkeypox crises for future pandemic readiness	2025	Frontiers in Education	10			3954	10.3389/feduc.2025.1518909	{Abdelouahed, 2025 #3954}	PDF	PDF	Interventions	Commentary	Not specified
Alotaibi, Alnajjar, Cappuccio, Khalid, Alhmiedat, Mubin	Efficacy of Emerging Technologies to Manage Childhood Obesity	2022	Diabetes Metab Syndr Obes	15		1227-1244	3964	10.2147/DMSO.S357176	{Alotaibi, 2022 #3964}	PDF	PDF	Interventions	Review	Machine learning / AI
An, Wang	Artificial Intelligence Applications to Public Health Nutrition	2023	Nutrients	15	19	4285	3966	10.3390/nu15194285	{An, 2023 #3966}	PDF	PDF	Interventions	Commentary	Machine learning
Anghel, Cioara, Moldovan, Antal, Pop, Salomie, Pop, Chifu	Smart Environments and Social Robots for Age-Friendly Integrated Care Services	2020	Int J Environ Res Public Health	17	11		4235	https://doi.org/10.3390/ijerph17113801	{Anghel, 2020 #4235}	PDF	PDF	Interventions	Review	Machine learning
Ayenigbara	The evolving nature of artificial intelligence: role in public health and health promotion	2024	J Public Health (Oxf)	46	2	e322-e323	3974	10.1093/pubmed/fdad240	{Ayenigbara, 2024 #3974}	PDF	PDF	Interventions	Commentary	Not specified
Bamashmous	The Role of Artificial Intelligence in Transforming Dental Public Health: Current Applications, Ethical Considerations, and Future Directions	2025	The Open Dentistry Journal	19	1		3977	10.2174/0118742106363413250211053942	{Bamashmous, 2025 #3977}	PDF	PDF	Interventions	Review	Not specified
Bauer, Lizotte	Artificial Intelligence, Intersectionality, and the Future of Public Health	2021	Am J Public Health	111	1	98-100	3979	10.2105/AJPH.2020.306006	{Bauer, 2021 #3979}	PDF	PDF	Interventions	Commentary	Not specified
Bharat, Hickman, Barbieri, Degenhardt	Big data and predictive modelling for the opioid crisis: existing research and future potential	2021	Lancet Digit Health	3	6	e397-e407	3981	10.1016/S2589-7500(21)00058-3	{Bharat, 2021 #3981}	PDF	PDF	Interventions	Review	Machine learning
Chassang, Beranger, Rial-Sebbag	The Emergence of AI in Public Health Is Calling for Operational Ethics to Foster Responsible Uses	2025	Int J Environ Res Public Health	22	4		3999	10.3390/ijerph22040568	{Chassang, 2025 #3999}	PDF	PDF	Interventions	Review	Not specified
Cochlin, Curran, Schmit	Unlocking Public Health Data: Navigating New Legal Guardrails and Emerging AI Challenges	2024	J Law Med Ethics	52	S1	70-74	4007	10.1017/jme.2024.40	{Cochlin, 2024 #4007}	PDF	PDF	Interventions	Commentary	Not specified
Cordeiro	Artificial Intelligence and Precision Public Health: A Balancing Act of Scientific Accuracy, Social Responsibility, and Community Engagement	2024	Port J Public Health	42	1	45778	4010	10.1159/000538141	{Cordeiro, 2024 #4010}	PDF	PDF	Interventions	Commentary	Not specified
Gao	The role of artificial intelligence in enhancing sports education and public health in higher education: innovations in teaching models, evaluation systems, and personalized training	2025	Front Public Health	13		1554911	4036	10.3389/fpubh.2025.1554911	{Gao, 2025 #4036}	PDF	PDF	Interventions	Commentary	VR/AR
Khalemsky, Khalemsky, Lankenau, Ataiants, Roth, Marcu, Schwartz	Predictive Dispatch of Volunteer First Responders: Algorithm Development and Validation	2023	JMIR Mhealth Uhealth	11		e41551	4320	https://doi.org/10.2196/41551	{Khalemsky, 2023 #4320}	PDF	PDF	Interventions	Primary study	Machine learning (random forest, neural network)
Leal Neto, Von Wyl	Digital Transformation of Public Health for Noncommunicable Diseases: Narrative Viewpoint of Challenges and Opportunities	2024	JMIR Public Health Surveill	10		e49575	4081	10.2196/49575	{Leal Neto, 2024 #4081}	PDF	PDF	Interventions	Commentary	GenAI
Liu, Zhang, Wang, Bao, Fu, Wang	Promoting active health with AI technologies: Current status and prospects of high-altitude therapy, simulated hypoxia, and LLM-driven lifestyle rehabilitation approaches	2025	Biosci Trends	19	3	252-265	4094	10.5582/bst.2025.01105	{Liu, 2025 #4094}	PDF	PDF	Interventions	Review	Machine learning
Marcus, Sewell, Balzer, Krakower	Artificial Intelligence and Machine Learning for HIV Prevention: Emerging Approaches to Ending the Epidemic	2020	Curr HIV/AIDS Rep	17	3	171-179	4108	10.1007/s11904-020-00490-6	{Marcus, 2020 #4108}	PDF	PDF	Interventions	Commentary	Machine learning
McDaniel, Essien, Lefcourt, Zelleke, Sinha, Chellappa, Abadir	Aging With Artificial Intelligence: How Technology Enhances Older Adults' Health and Independence	2025	J Gerontol A Biol Sci Med Sci	80	7		4114	10.1093/gerona/glaf086	{McDaniel, 2025 #4114}	PDF	PDF	Interventions	Commentary	Not specified
Moore, Al-Tamimi, Freeman	Investigating the Potential of a Conversational Agent (Phyllis) to Support Adolescent Health and Overcome Barriers to Physical Activity: Co-Design Study	2024	JMIR Form Res	8		e51571	4117	10.2196/51571	{Moore, 2024 #4117}	PDF	PDF	Interventions	Primary study	Chatbots
Park, Ahn, Ahn, Ahn, Park, Kwon, Ahn, Yang	Artificial Intelligence and Aging in Place: A Scoping Review of Current Applications and Future Directions	2025	Gerontologist	65	6		4134	10.1093/geront/gnaf130	{Park, 2025 #4134}	PDF	PDF	Interventions	Review	Not specified
Baclic, Tunis, Young, Doan, Swerdfeger, Schonfeld	Challenges and opportunities for public health made possible by advances in natural language processing	2020	Can Commun Dis Rep	46	6	161-168	3976	10.14745/ccdr.v46i06a02	{Baclic, 2020 #3976}	PDF	PDF	Public Health Organisations	Commentary	Natural language processing
Bamashmous	The Role of Artificial Intelligence in Transforming Dental Public Health: Current Applications, Ethical Considerations, and Future Directions	2025	The Open Dentistry Journal	19	1		3977	10.2174/0118742106363413250211053942	{Bamashmous, 2025 #3977}	PDF	PDF	Public Health Organisations	Review	Machine learning
Bharel, Auerbach, Nguyen, DeSalvo	Transforming Public Health Practice With Generative Artificial Intelligence	2024	Health Aff (Millwood)	43	6	776-782	3982	10.1377/hlthaff.2024.00050	{Bharel, 2024 #3982}	PDF	PDF	Public Health Organisations	Commentary	GenAI
Chassang, Beranger, Rial-Sebbag	The Emergence of AI in Public Health Is Calling for Operational Ethics to Foster Responsible Uses	2025	Int J Environ Res Public Health	22	4		3999	10.3390/ijerph22040568	{Chassang, 2025 #3999}	PDF	PDF	Public Health Organisations	Review	Not specified
Cochlin, Curran, Schmit	Unlocking Public Health Data: Navigating New Legal Guardrails and Emerging AI Challenges	2024	J Law Med Ethics	52	S1	70-74	4007	10.1017/jme.2024.40	{Cochlin, 2024 #4007}	PDF	PDF	Public Health Organisations	Commentary	Not specified
Cordeiro	Artificial Intelligence and Precision Public Health: A Balancing Act of Scientific Accuracy, Social Responsibility, and Community Engagement	2024	Port J Public Health	42	1	45778	4010	10.1159/000538141	{Cordeiro, 2024 #4010}	PDF	PDF	Public Health Organisations	Commentary	Not specified
Dalvi, Kotwadekar, Kalghatgi, Madhu, Methildeotare	Exploring the Current Applications and Future Implications of Artificial Intelligence in Public Health Dentistry: A Narrative Review	2025	Journal of Clinical and Diagnostic Research	19	7	ZE06 EP - ZE09	4014	10.7860/jcdr/2025/79795.21274	{Dalvi, 2025 #4014}	PDF	PDF	Public Health Organisations	Commentary	Not specified
Hattab, Irrgang, Korber, Kuhnert, Ladewig	The Way Forward to Embrace Artificial Intelligence in Public Health	2025	Am J Public Health	115	2	123-128	4052	10.2105/AJPH.2024.307888	{Hattab, 2025 #4052}	PDF	PDF	Public Health Organisations	Commentary	Not specified
Kamitani, Koenig, Sullivan	Transformative potential of artificial intelligence in US CDC HIV interventions: balancing innovation with health privacy	2025	AIDS	39	10	1311-1321	4070	10.1097/QAD.0000000000004220	{Kamitani, 2025 #4070}	PDF	PDF	Public Health Organisations	Editorial review	Machine learning
Kon, Pereira, Molina, Yip, Abisheganaden, Yip	Unravelling ChatGPT's potential in summarising qualitative in-depth interviews	2025	Eye (Lond)	39	2	354-358	4076	10.1038/s41433-024-03419-0	{Kon, 2025 #4076}	PDF	PDF	Public Health Organisations	Primary study	GenAI
Leal Neto, Von Wyl	Digital Transformation of Public Health for Noncommunicable Diseases: Narrative Viewpoint of Challenges and Opportunities	2024	JMIR Public Health Surveill	10		e49575	4081	10.2196/49575	{Leal Neto, 2024 #4081}	PDF	PDF	Public Health Organisations	Commentary	Not specified
Resch, Kolokoussis, Hanny, Brovelli, Kamel Boulos	The generative revolution: AI foundation models in geospatial health-applications, challenges and future research	2025	Int J Health Geogr	24	1	6	4144	10.1186/s12942-025-00391-0	{Resch, 2025 #4144}	PDF	PDF	Public Health Organisations	Commentary	Large language models
Arifuzzaman, Shaikh, Bhuiyan, Chowdhury, Atoul	Innovation in public health surveillance for social distancing during the COVID-19 pandemic: A deep learning and object detection based novel approach	2024	PLoS One	19	9	e0308460	3970	10.1371/journal.pone.0308460	{Arifuzzaman, 2024 #3970}	PDF	PDF	Surveillance	Primary study	Deep learning
Dubey, Keswani, Dubey, Keswani, Bhagat	Innovative IoT-enabled mask detection system: A hybrid deep learning approach for public health applications	2025	MethodsX	14		103291	4024	10.1016/j.mex.2025.103291	{Dubey, 2025 #4024}	PDF	PDF	Surveillance	Review and primary study	Deep learning

## Sheet: Lists
UK	UK			2025 World Bank Economies
England	UK			LOW-INCOME ECONOMIES ($1,145 OR LESS)	Afghanistan,Burkina Faso,Burundi,Central African Republic,Chad,Congo,Eritrea,Ethiopia,Gambia,Guinea-Bissau,North Korea,Liberia,Madagascar,Malawi,Mali,Mozambique,Niger,Rwanda,Sierra Leone,Somalia,South Sudan,Sudan,Syrian Arab Republic,Syria,Togo,Uganda,Yemen
Wales	UK			LOWER-MIDDLE INCOME ECONOMIES ($1,146 TO $4,515)	Angola,Bangladesh,Benin,Bhutan,Bolivia,Cabo Verde,Cambodia,Cameroon,Comoros,Congo,Côte d'Ivoire,Cote d'Ivoire,Ivory coast,Djibouti,Egypt,Eswatini,Ghana,Guinea,Haiti,Honduras,India,Jordan,Kenya,Kiribati,Kyrgyz Republic,Kygryzstan,Lao,Laos,Lebanon,Lesotho,Mauritania,Micronesia,Morocco,Myanmar,Nepal,Nicaragua,Nigeria,Pakistan,Papua New Guinea,Philippines,Samoa,São Tomé,Principe,Senegal,Solomon Islan…
Scotland	UK			UPPER-MIDDLE-INCOME ECONOMIES ($4,516 TO $14,005)	Albania,Algeria,Argentina,Armenia,Azerbaijan,Belarus,Belize,Bosnia,Herzegovina,Botswana,Brazil,China,Colombia,Costa Rica,Cuba,Dominica,Dominican Republic ,Ecuador,El Salvador,Equatorial Guinea,Fiji,Gabon,Georgia,Grenada,Guatemala,Indonesia,Iran,Iraq,Jamaica,Kazakhstan,Kosovo,Libya,Malaysia,Maldives,Marshall Islands,Mauritius,Mexico,Moldova,Mongolia,Montenegro,Namibia,North Macedonia,Paraguay,Peru…
Northern Ireland	UK			HIGH-INCOME ECONOMIES ($14,006 OR MORE)	American Samoa,Andorra,Antigua,Barbuda,Aruba,Australia,Austria,Bahamas,Bahrain,Barbados,Belgium,Bermuda,British Virgin Islands ,Brunei,Bulgaria,Canada,Cayman Islands ,Channel Islands ,Chile,Croatia,Curaçao,Cyprus,Czech Republic, Czechia,Denmark,Estonia,Faroe Islands,Finland,France,French Polynesia,Germany,Gibraltar,Greece,Greenland,Guam,Guyana,Hong Kong,Hungary,Iceland,Ireland,Isle of Man,Israel,…
Albania	Europe
Andorra	Europe
Austria	Europe
Belarus	Europe
Belgium	Europe
Bosnia and Herzegovina	Europe
Bulgaria	Europe
Croatia	Europe
Cyprus	Europe
Czech	Europe
Denmark	Europe
European Union	Europe
Estonia	Europe
Faroe Islands	Europe
Finland	Europe
France	Europe
Germany	Europe
Greece	Europe
Hungary	Europe
Iceland	Europe
Ireland	Europe
Italy	Europe
Latvia	Europe
Liechtenstein	Europe
Lithuania	Europe
Luxembourg	Europe
Malta	Europe
Moldova	Europe
Monaco	Europe
Montenegro	Europe
Netherlands	Europe
North Macedonia	Europe
Norway	Europe
Poland	Europe
Portugal	Europe
Romania	Europe
Russia	Europe
San Marino	Europe
Serbia	Europe
Slovakia	Europe
Slovenia	Europe
Spain	Europe
Sweden	Europe
Switzerland	Europe
The Netherlands	Europe
Türkiye	Europe
Turkey	Europe
Ukraine	Europe
Afghanistan	Asia
Armenia	Asia
Asia	Asia
Azerbaijan	Asia
Bahrain	Asia
Bangladesh	Asia
Bhutan	Asia
Brunei	Asia
Cambodia	Asia
China	Asia
North Korea	Asia
Georgia	Asia
Hong Kong	Asia
India	Asia
Indonesia	Asia
Iran	Asia
Iraq	Asia
Israel	Asia
Japan	Asia
Jordan	Asia
Kazakhstan	Asia
Korea	Asia
Kuwait	Asia
Kyrgyzstan	Asia
Laos	Asia
Lebanon	Asia
Malaysia	Asia
Maldives	Asia
Mongolia	Asia
Myanmar	Asia
Nepal	Asia
Oman	Asia
Pakistan	Asia
Palestine	Asia
Philippines	Asia
Qatar	Asia
South Korea	Asia
Saudi Arabia	Asia
Singapore	Asia
Sri Lanka	Asia
Syria	Asia
Taiwan	Asia
Tajikistan	Asia
Thailand	Asia
Timor-Leste	Asia
Turkmenistan	Asia
UAE	Asia
United Arab Emirates	Asia
Uzbekistan	Asia
Vietnam	Asia
Yemen	Asia
Algeria	Africa
Angola	Africa
Benin	Africa
Botswana	Africa
Burundi	Africa
Cameroon	Africa
Cape Verde	Africa
Chad	Africa
Comoros	Africa
Congo	Africa
Congo	Africa
Cote d'lvoire	Africa
Djibouti	Africa
Egypt	Africa
Equatorial Guinea	Africa
Eritrea	Africa
Ethiopia	Africa
Gabon	Africa
Gambia	Africa
Ghana	Africa
Guinea	Africa
Guinea Bissau	Africa
Kenya	Africa
Lesotho	Africa
Liberia	Africa
Libya	Africa
Madagascar	Africa
Malawi	Africa
Mali	Africa
Mauritania	Africa
Mauritius	Africa
Morocco	Africa
Mozambique	Africa
Namibia	Africa
Niger	Africa
Nigeria	Africa
Rwanda	Africa
Sao Tome and Principe	Africa
Senegal	Africa
Seychelles	Africa
Sierra Leone	Africa
Somalia	Africa
South Africa	Africa
South Sudan	Africa
Sudan	Africa
Tanzania	Africa
The Central African Republic	Africa
Togo	Africa
Tunisia	Africa
Uganda	Africa
Zambia	Africa
Zimbabwe	Africa
Antigua and Barbuda	North America
Bahamas	North America
Barbados	North America
Canada	North America
Costa Rica	North America
Cuba	North America
Dominica	North America
Dominican Republic	North America
Grenada	North America
Jamaica	North America
Mexico	North America
Panama	North America
Papua New Guinea	North America
Trinidad and Tobago	North America
US	North America
USA	North America
Argentina	South America
Bolivia	South America
Brazil	South America
Chile	South America
Colombia	South America
Ecuador	South America
Guyana	South America
Peru	South America
Suriname	South America
Uruguay	South America
Venezuela	South America
Australia	Oceania
Cook Islands	Oceania
Fiji	Oceania
Micronesia	Oceania
New Zealand	Oceania
Niue	Oceania
Samoa	Oceania
Tonga	Oceania
Vanuatu	Oceania
Not stated	Not stated
